# Supplementary material for: Allostery can convert binding free energies into concerted domain motions in enzymes
Source: Springer Nature journal article supplement (doi:10.1038/s41467-024-54421-9), 2024-11-21
Supplement: MOESM1 [file 41467_2024_54421_MOESM1_ESM.pdf]

## SUPPLEMENTARY INFORMATION

### **Allostery can convert binding free energies into concerted domain motions in enzymes**

Nicole Stéphanie Galenkamp<sup>\*1</sup>, Sarah Zernia<sup>\*1</sup>, Yulan B. Van Oppen<sup>2</sup>, Marco van den Noort<sup>1</sup>, Andreas Miliadis Argeitis<sup>2</sup> & Giovanni Maglia<sup>#1</sup>

<sup>1</sup>Chemical biology, Groningen Biomolecular Sciences & Biotechnology Institute, University of Groningen, 9747 AG Groningen, The Netherlands

<sup>2</sup>Molecular Systems Biology, Groningen Biomolecular Sciences & Biotechnology Institute, University of Groningen, 9747 AG Groningen, The Netherlands

\*Equal contribution

#Corresponding author: [giovanni.maglia@rug.nl](mailto:giovanni.maglia@rug.nl)

## Supplementary discussion

### *Activity of AK\_2K*

The activity of AK variants was tested as described in details earlier<sup>1-3</sup>. In short, a coupled assay was performed whereby the backward reaction ( $\text{ADP} + \text{ADP} + \text{Mg}^{2+} \rightarrow \text{ATP} + \text{AMP} + \text{Mg}^{2+}$ ) was measured by following the reduction of  $\text{NADP}^+$  to NADPH at 340 nm. Hereby the formed ATP by the adenylate kinase, together with glucose was converted to ADP and glucose-6-phosphate. After, the glucose-6-phosphate was reacted to 6-phospho-glucono-D-glucono-1,5-lactone by glucose-6-phosphate dehydrogenase, while using  $\text{NADP}^+$  as a factor, with NADPH, the readout component, as product (Supplementary Figure 1).

### *Adenylate kinase occupies three different binding positions in the nanopore.*

AK showed three types of characteristic signals named Type-a, -b and -c blockades. At low potential (-50 mV), mostly type-b blockades were observed ( $84.0 \pm 14.3\%$ ), while increasing the applied potential, the other two blockades appeared. At -90 mV Type-a and Type-b blockades were almost equally represented ( $35.4 \pm 7.1\%$  and  $46.7 \pm 15.7\%$  of the time, respectively), and low-noise signals ( $I_{\text{RES}}$  of  $46.0 \pm 0.1\%$  and  $58.5 \pm 0.3\%$ , respectively, Supplementary Figure 2, 400 mM KCl, 15 mM Tris, 2 mM  $\text{MgCl}_2$ , pH 7.5). Type-c blockades represented only about 18% of the total and showed higher current noise (Supplementary Figure 2). The dwell time of Type-c and Type-b blockades showed a maximum at  $\sim -70$  mV, suggesting that the protein translocated above that threshold potential. The dwell time of Type-a blockades increased with the potential (Supplementary Figure 2), indicating that this protein group did not translocate across the nanopore. These blockades can be due to a protein impurity or the entry of AK inside the nanopore with a different position/orientation (Supplementary Figure 2). The addition of  $P^1, P^5$ -Di-(adenosine-5')-pentaphosphate (Ap5A), an inhibitor of AK, to either the *trans* or *cis* side of the nanopore changed Type-a and Type-b blockades (Supplementary Figure 4), suggesting that these blockades represent AK. Type-a blockades fluctuated between five interconverting current levels: M, M1, M2, M3 and M4 ( $I_{\text{RES\_M1}} = 46.3 \pm 0.2\%$ ,  $I_{\text{RES\_M2}} = 48.6 \pm 0.2\%$ ,  $I_{\text{RES\_M3}} = 51.0 \pm 0.1\%$ ,  $I_{\text{RES\_M4}} = 53.6 \pm 0.1\%$ , respectively, Figure 2B, Supplementary Figure 5, Supplementary Table 2), while Type-b blockade showed one additional current level ( $I_{\text{RES}} = 56.6 \pm 0.2$ ). Previously, thrombin and haemoglobin have shown to induce two current blockades by interacting with different binding sites inside the ClyA and PlyAB nanopore, respectively<sup>4,5</sup>. The current blockades showed a voltage dependency with the binding to shallower sites being more prominent at lower applied potentials. In another case, it was shown that SBD2 can enter in two different orientations within the ClyA nanopore, which induce two separate current levels<sup>6</sup>. Given that Type-a and -b blockades reacted to the inhibitor, we think the most likely explanation is that they represent AK entering inside the nanopore with two different orientations. Type-c blockades remained unchanged by Ap5A suggesting they represented misfolded proteins or impurities from the protein preparation.

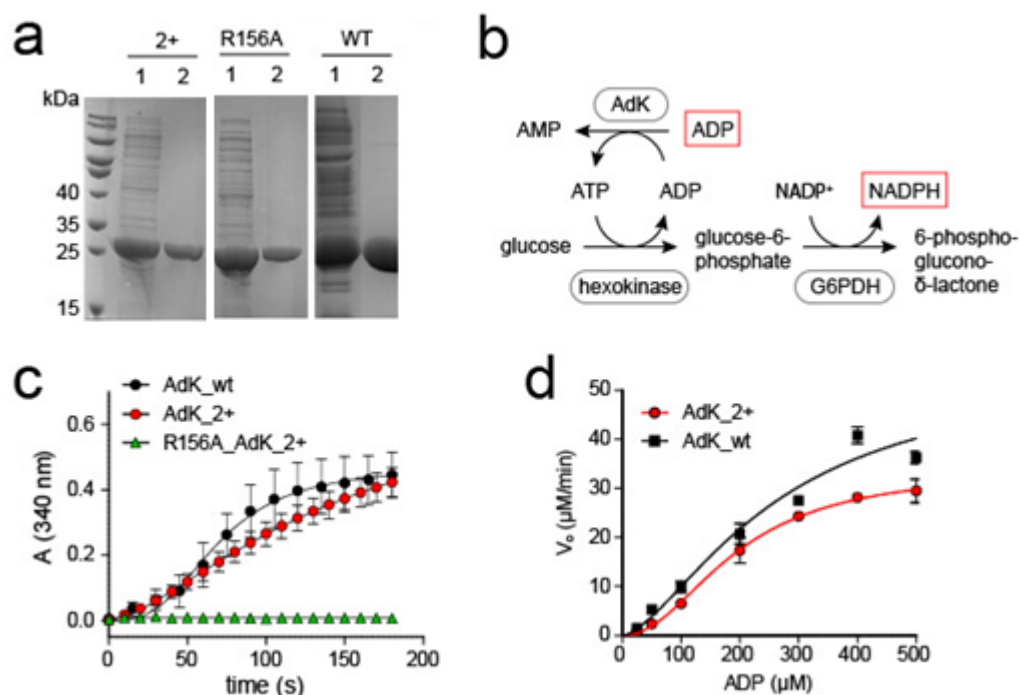

**Supplementary Figure 1. Protein production and bulk activity.** (a) SDS-PAGE of AK variants before (1) and after (2) affinity-based purification on Strep-tactin sepharose: 2+= AK\_2+; R156A= R156A\_AK\_2+; WT= wild-type AK. Standard: Page Ruler prestained, staining: Coomassie. (b) Reaction scheme of bulk activity assay. (c) Time-dependent bulk activity assay of AK variants in 400 mM KCl, 15 mM Tris, 2 mM MgCl<sub>2</sub>, pH 7.5 with ADP as substrate. Data points represent the mean  $\pm$  SEM ( $n = 3$ ). (d) Concentration-dependent bulk activity assay of AK\_wt and AK\_2+. Initial velocity of time-dependent measurements was fitted to a hill equation.

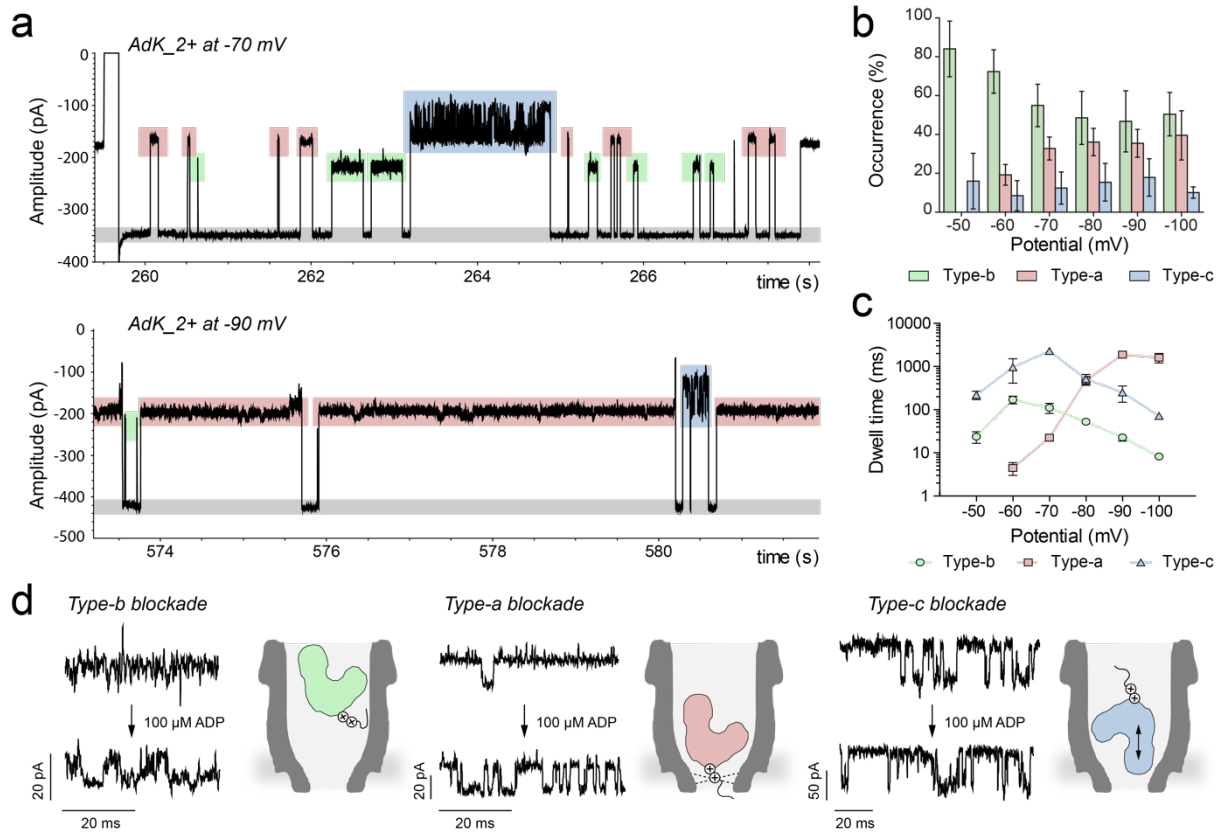

**Supplementary Figure 2. AK<sub>2</sub><sup>+</sup> signal in the ClyA-AS nanopore. (a)** Example traces of AK<sub>2</sub><sup>+</sup> in ClyA-AS at two different potentials. The open pore current ( $I_o$ ) is labelled in grey. Three types of protein blockades ( $I_B$ ) could be identified, named Type-a (red), Type-b (green), and Type-c (blue). The experiments were performed in 400 mM KCl, 15 mM Tris, 2 mM MgCl<sub>2</sub>, pH 7.5 with a negative bias (*trans*), 10 kHz sampling rate and 2 kHz low-pass Bessel filter. For figure preparation, traces were additionally filtered with a 500 Hz Gaussian filter. **(b)** Appearance of the three different blockade types. Individual blockades were counted and compared to the sum of all blockades. **(c)** Mean dwell times of the three different blockade types in dependency of the applied potential. **(b+c)** Data points represent the mean  $\pm$  SEM ( $n = 3$ ). **(d)** Ligand response of individual blockade types. Protein was added from *cis*, 100  $\mu$ M ADP from *trans*, -90 mV was applied (*trans*). Schemes show the interpretation of the different blockade types of AK<sub>2</sub><sup>+</sup> (green, red or blue, respectively) in the ClyA nanopore (grey).



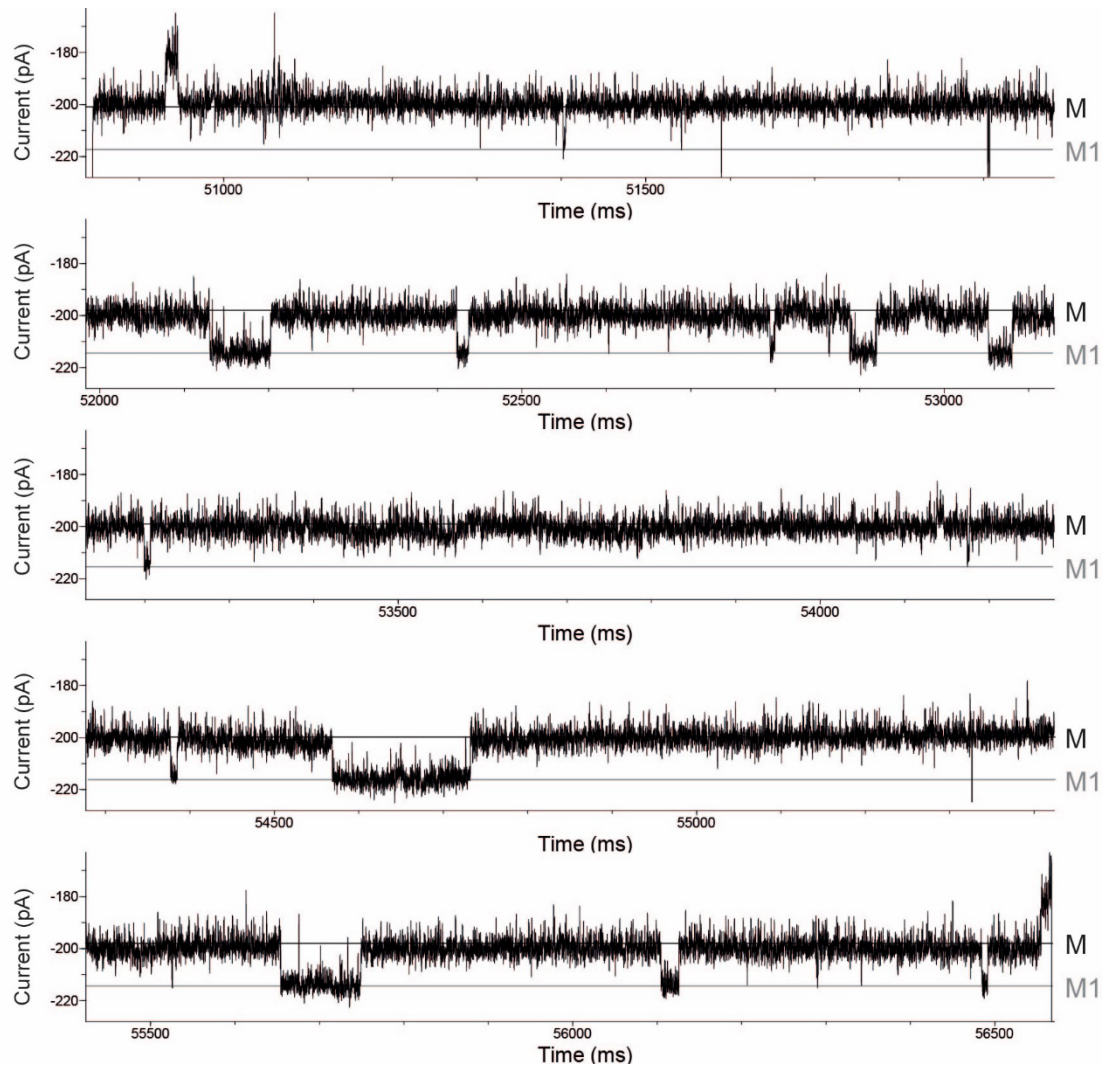

**Supplementary Figure 3. Continuous recording of AK<sub>2</sub><sup>+</sup> conformational changes of the *apo*-enzyme.** M and M1 represent the open conformation (black and grey line). The measurements were performed in 400 mM KCl, 15 mM Tris, 2 mM MgCl<sub>2</sub>, pH 7.5 at room temperature (22°C) applying -90 mV (*trans*) and sampling at 50 kHz with a 10 kHz Bessel-low filter, additionally digitally filtered with a 2 kHz Gaussian low-pass filter.

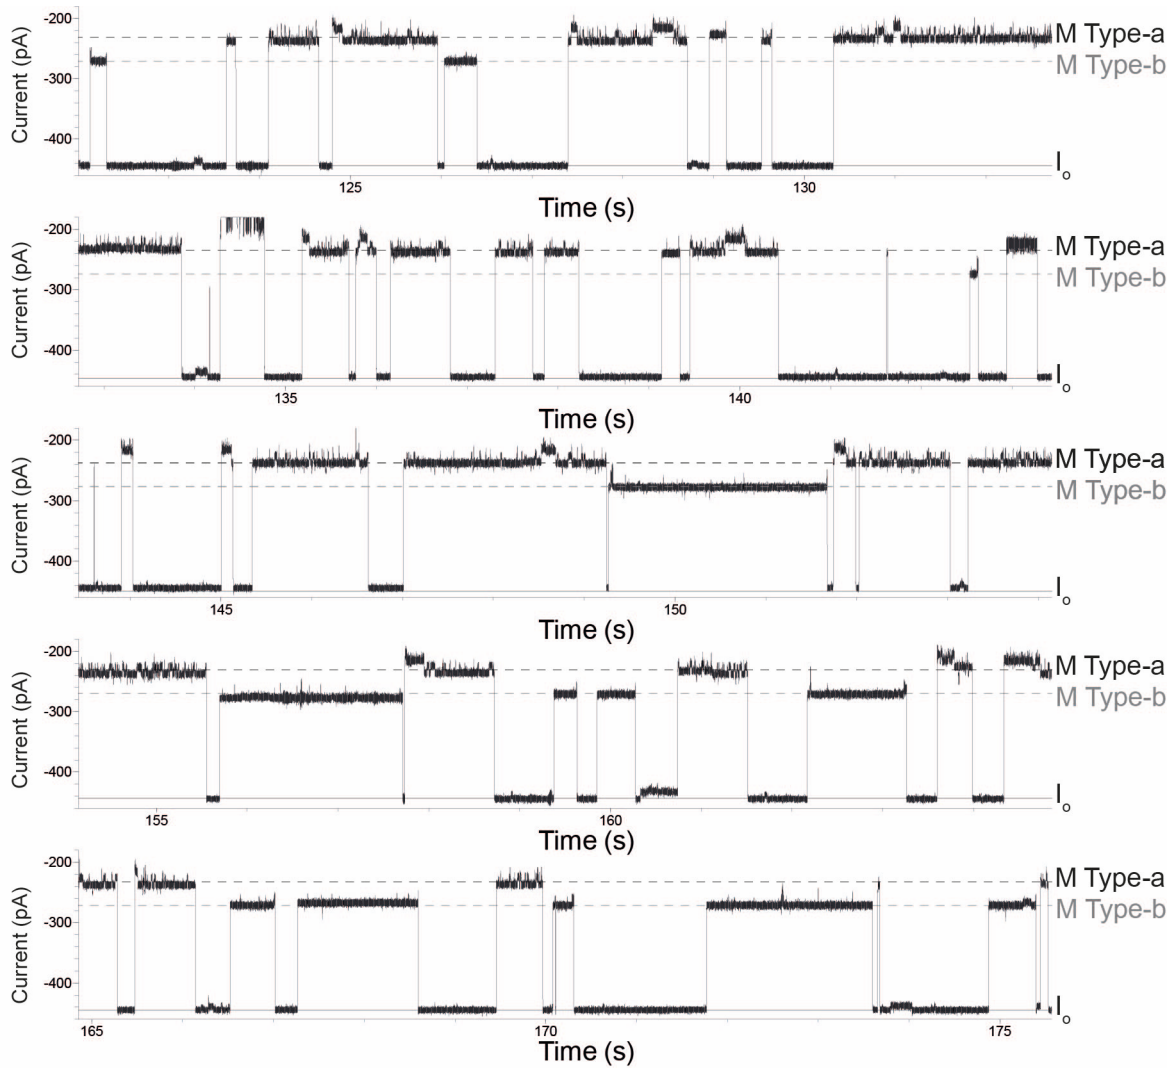

**Supplementary Figure 4. AK<sub>2+</sub> current blockades in the ClyA-AS nanopore upon binding of Ap5A.** Current trace showing the capture of different AK<sub>2+</sub> types inside ClyA-AS at -90 mV applied potential after addition of 10  $\mu$ M Ap5A to the *cis* compartment. Two types of AK protein blockades are observed based on residual current. The black dashed line indicates Type-a blockades and the grey dashed line indicates Type-b blockades. The measurements were performed in 400 mM KCl, 15 mM Tris, 2 mM MgCl<sub>2</sub>, pH 7.5 at room temperature (22°C) applying -90 mV (*trans*) and sampling at 50 kHz with a 10 kHz Bessel-low filter, additionally digitally filtered with a 2 kHz Gaussian low-pass filter.

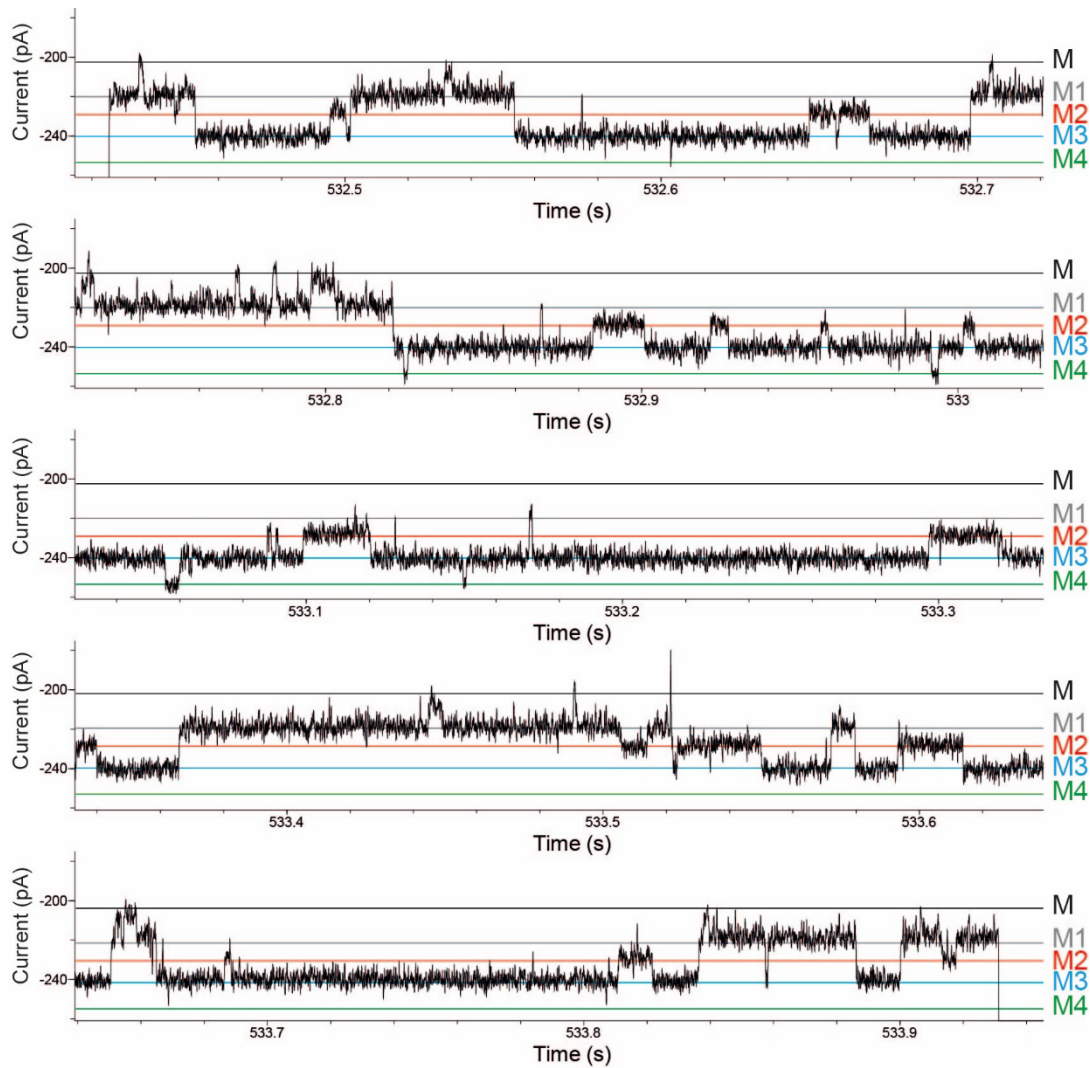

**Supplementary Figure 5. Continuous recording of AK<sub>2</sub><sup>+</sup> conformational changes during the binding of Ap5A.** Ap5A (10  $\mu$ M) was added to the *trans* chamber. M and M1 represent the open conformation (black and grey line), M2 the protein with the LID domain closed (red line), M3 with both the LID and NMP domain closed (blue line) and M4 with completely closed enzyme (green line). The measurements were performed in 400 mM KCl, 15 mM Tris, 2 mM MgCl<sub>2</sub>, pH 7.5 at room temperature (22°C) applying -90 mV (*trans*) and sampling at 50 kHz with a 10 kHz Bessel-low filter, additionally digitally filtered with a 2 kHz Gaussian low-pass filter.

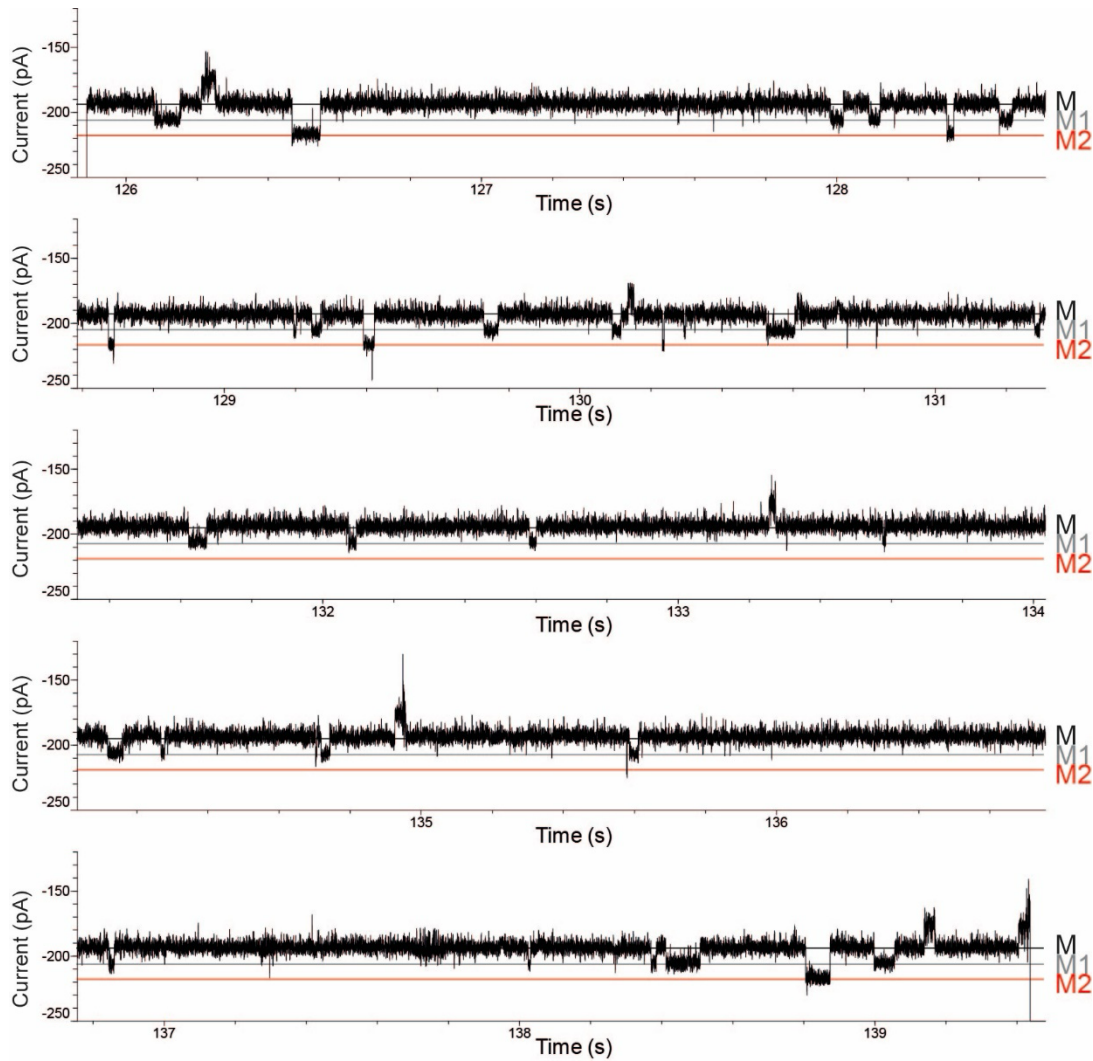

**Supplementary Figure 6. Continuous recording of AK<sub>2</sub><sup>+</sup> conformational changes during the binding of AMP.** AMP (1 mM) was added to the *trans* chamber. M and M1 represent the open conformation (black and grey line) and M2 the protein with the LID domain closed (red line). The measurements were performed in 400 mM KCl, 15 mM Tris, 2 mM MgCl<sub>2</sub>, pH 7.5 at room temperature (22°C) applying -90 mV (*trans*) and sampling at 50 kHz with a 10 kHz Bessel-low filter, additionally digitally filtered with a 2 kHz Gaussian low-pass filter.

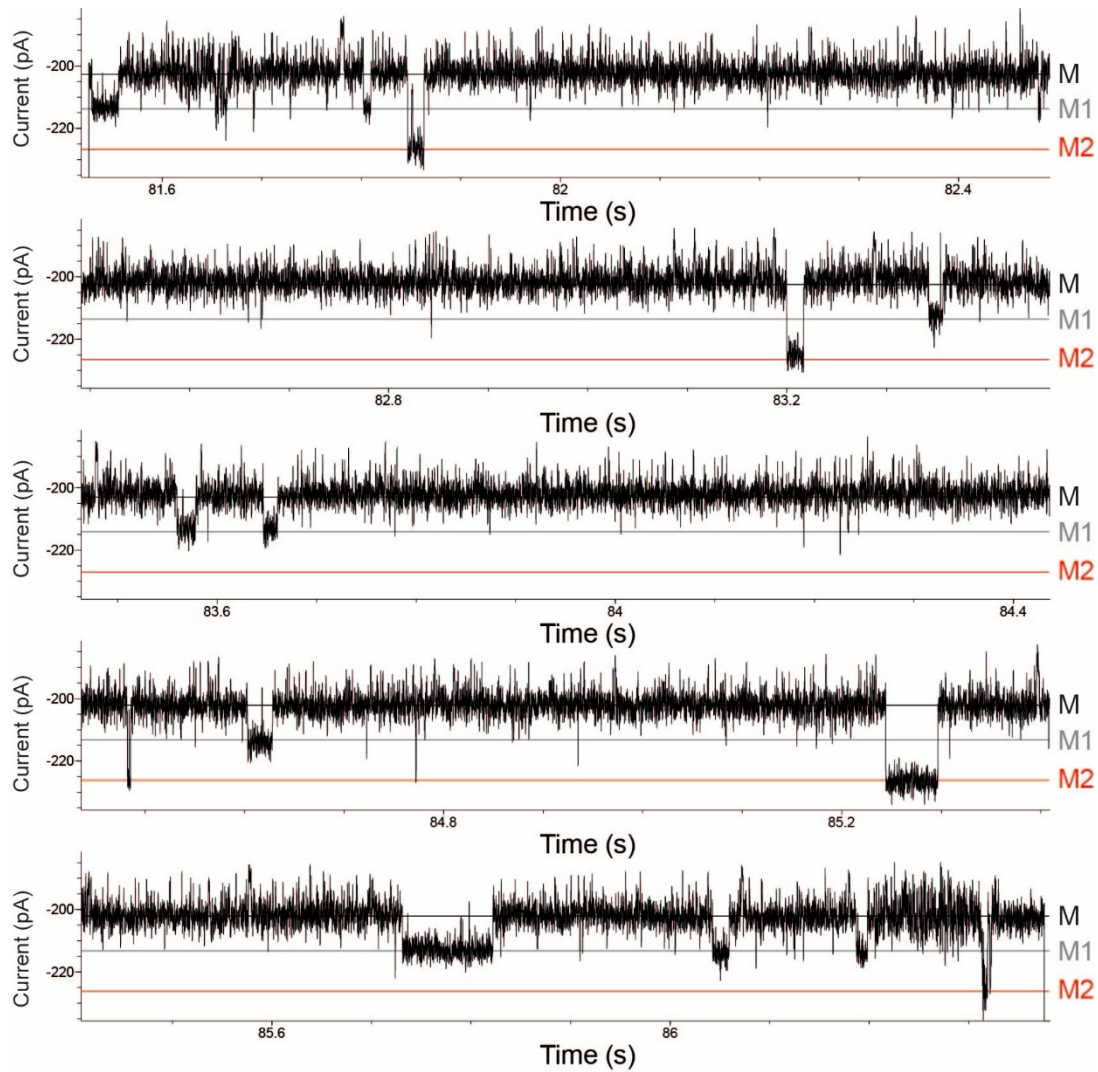

**Supplementary Figure 7. Continuous recording of AK<sub>2</sub><sup>+</sup> conformational changes during the binding of AMP without Mg<sup>2+</sup>.** AMP (1 mM) was added to the *trans* chamber. M and M1 represent the open conformation (black and grey line) and M2 the protein with the LID domain closed (red line). The measurements were performed in 400 mM KCl, 15 mM Tris, 100  $\mu$ M EDTA, pH 7.5 at room temperature (22°C) applying -90 mV (*trans*) and sampling at 50 kHz with a 10 kHz Bessel-low filter, additionally digitally filtered with a 2 kHz Gaussian low-pass filter.



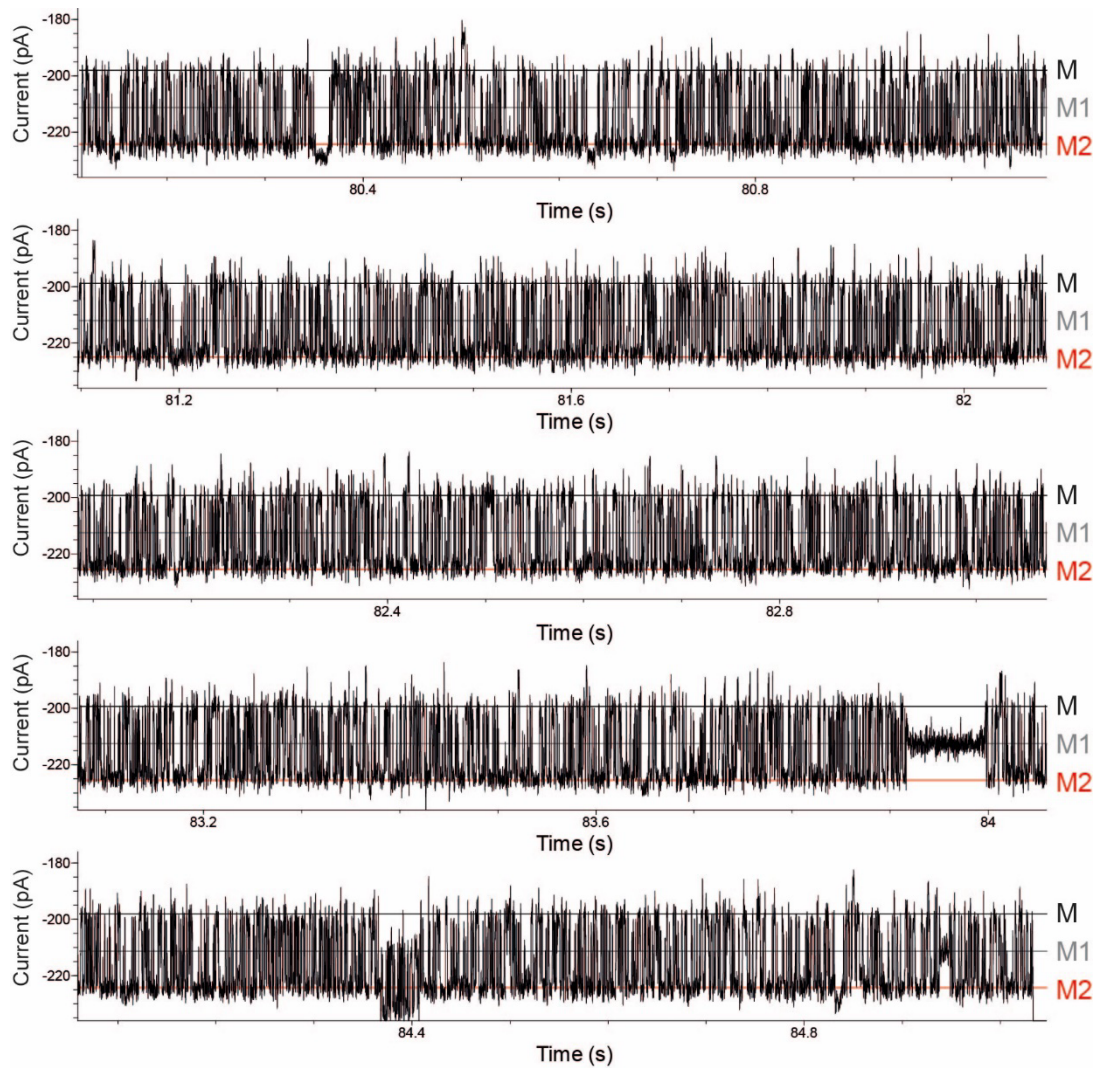

**Supplementary Figure 8. Continuous recording of AK<sub>2</sub><sup>+</sup> conformational changes during the binding of ATP.** ATP (1 mM) was added to the *trans* chamber. M and M1 represent the open conformation (black and grey line) and M2 the protein with the LID domain closed (red line). The measurements were performed in 400 mM KCl, 15 mM Tris, 2 mM MgCl<sub>2</sub>, pH 7.5 at room temperature (22°C) applying -90 mV (*trans*) and sampling at 50 kHz with a 10 kHz Bessel-low filter, additionally digitally filtered with a 2 kHz Gaussian low-pass filter.

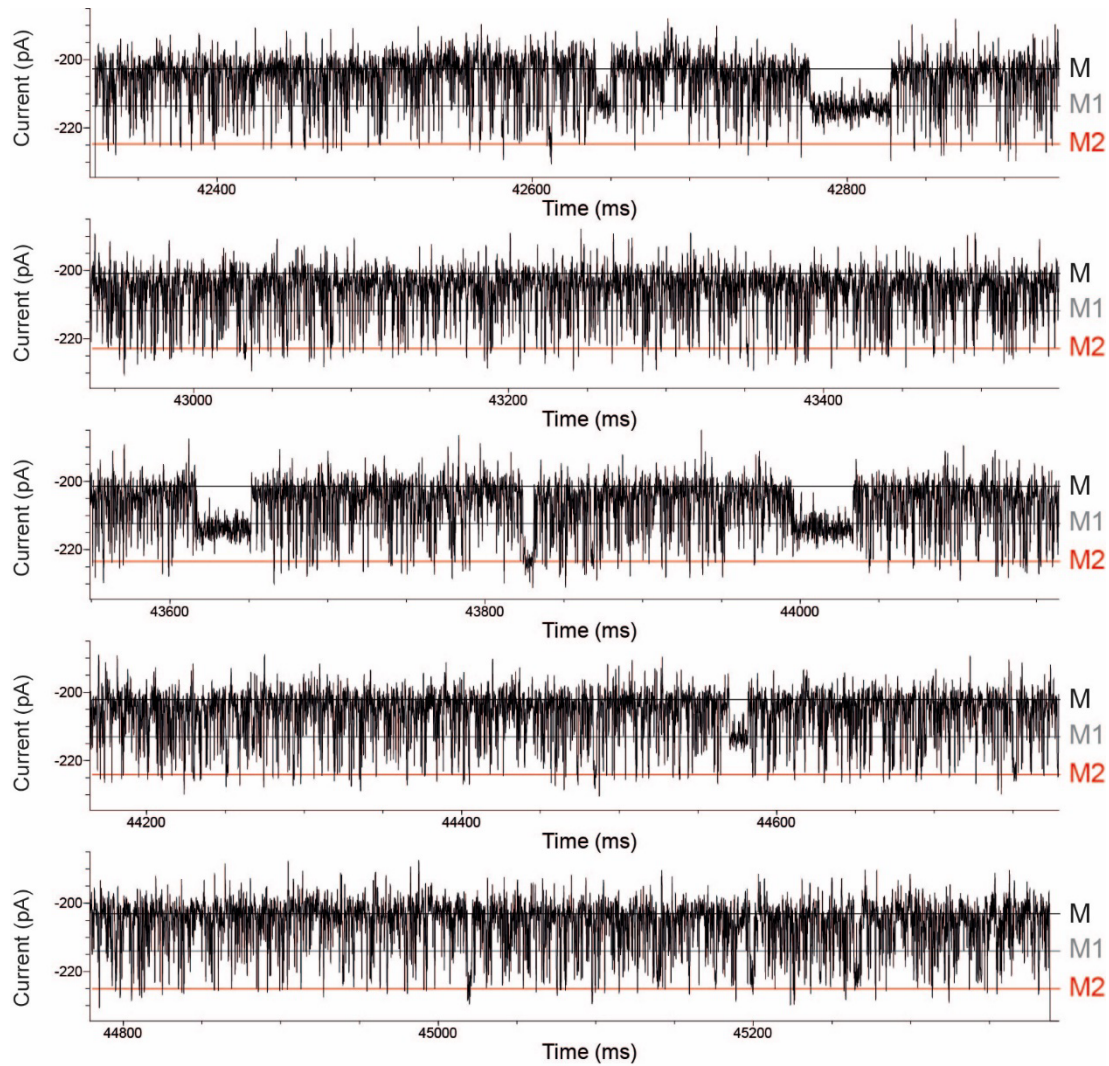

**Supplementary Figure 9. Continuous recording of AK<sub>2</sub><sup>+</sup> conformational changes during the binding of ATP without Mg<sup>2+</sup>.** ATP (1 mM) was added to the *trans* chamber. M and M1 represent the open conformation (black and grey line) and M2 the protein with the LID domain closed (red line). The measurements were performed in 400 mM KCl, 15 mM Tris, 100  $\mu$ M EDTA, pH 7.5 at room temperature (22°C) applying -90 mV (*trans*) and sampling at 50 kHz with a 10 kHz Bessel-low filter, additionally digitally filtered with a 2 kHz Gaussian low-pass filter.

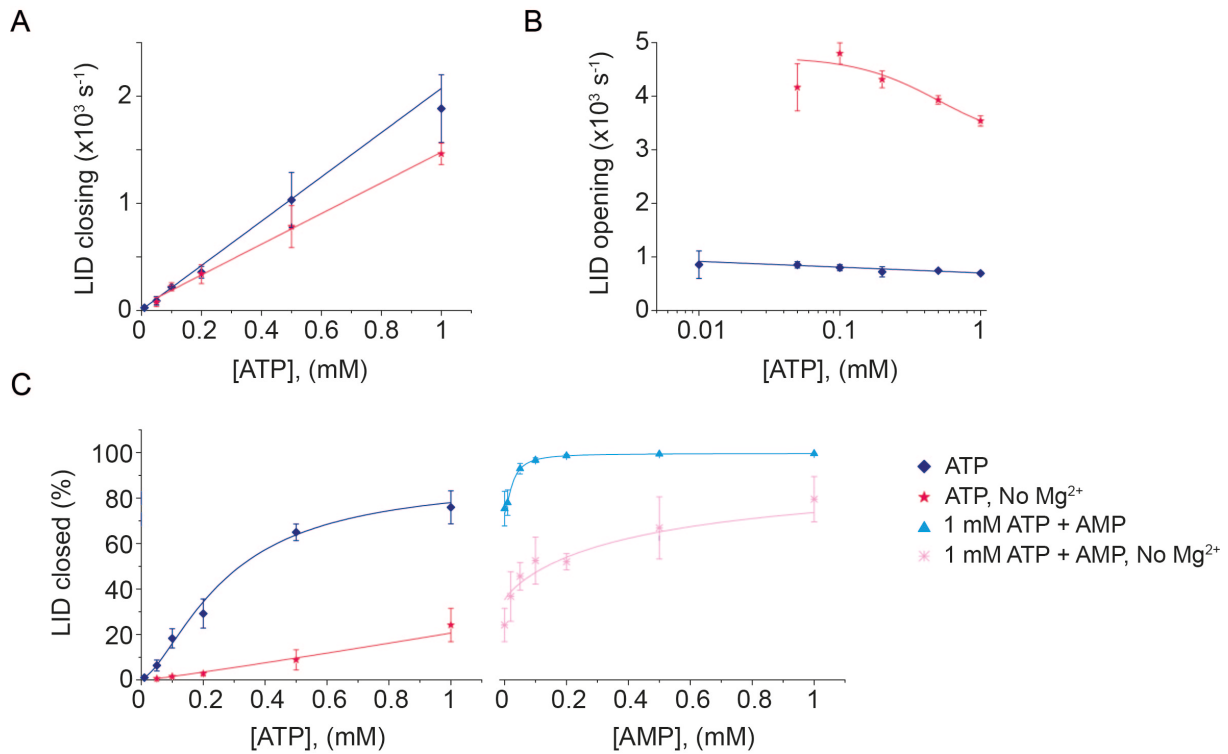

**Supplementary Figure 10. Kinetics of ATP binding without  $\text{Mg}^{2+}$ .** (A) Frequency of LID closing - measured as the inverse of dwell times - at increasing ATP concentrations. The lines indicate a linear fit. (B) LID opening frequency at increasing ATP concentrations. The lines are fitting the data to a Hill equation. (C) Percentage of the closed LID domain at increasing ligand concentrations. The lines indicate fitting to a Hill equation. The measurements were performed in 400 mM KCl, 15 mM Tris, 2 mM  $\text{MgCl}_2$  (except when omitted), pH 7.5 at room temperature (22°C) applying -90 mV (*trans*) and sampling at 50 kHz with a 10 kHz Bessel-low filter, additionally digitally filtered with a 2 kHz Gaussian low-pass filter. Ligands were added to the *trans* chamber and the enzyme to the *cis* chamber. Error bars in all graphs represents the standard deviation of the mean between independent experiments (N = 3).



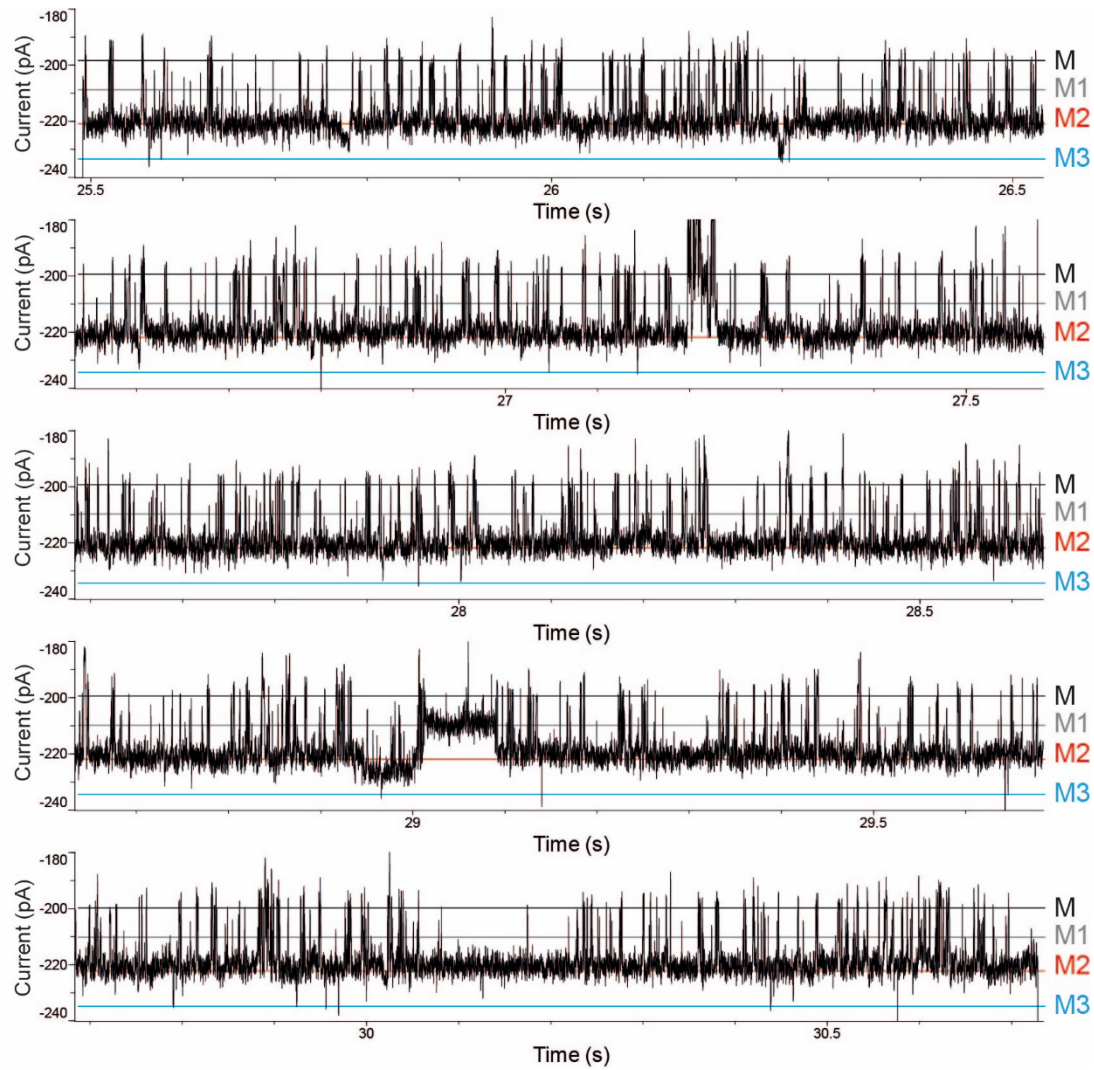

**Supplementary Figure 11. Continuous recording of AK<sub>2</sub><sup>+</sup> conformational changes during the binding of ATP and AMP.** ATP (1 mM) and AMP (100  $\mu$ M) were added to the *trans* chamber. M and M1 represent the open conformation (black and grey line), M2 the protein with the LID domain closed (red line) and M3 with both the LID and NMP domain closed (blue line). The measurements were performed in 400 mM KCl, 15 mM Tris, 2 mM MgCl<sub>2</sub>, pH 7.5 at room temperature (22°C) applying -90 mV (*trans*) and sampling at 50 kHz with a 10 kHz Bessel-low filter, additionally digitally filtered with a 2 kHz Gaussian low-pass filter.

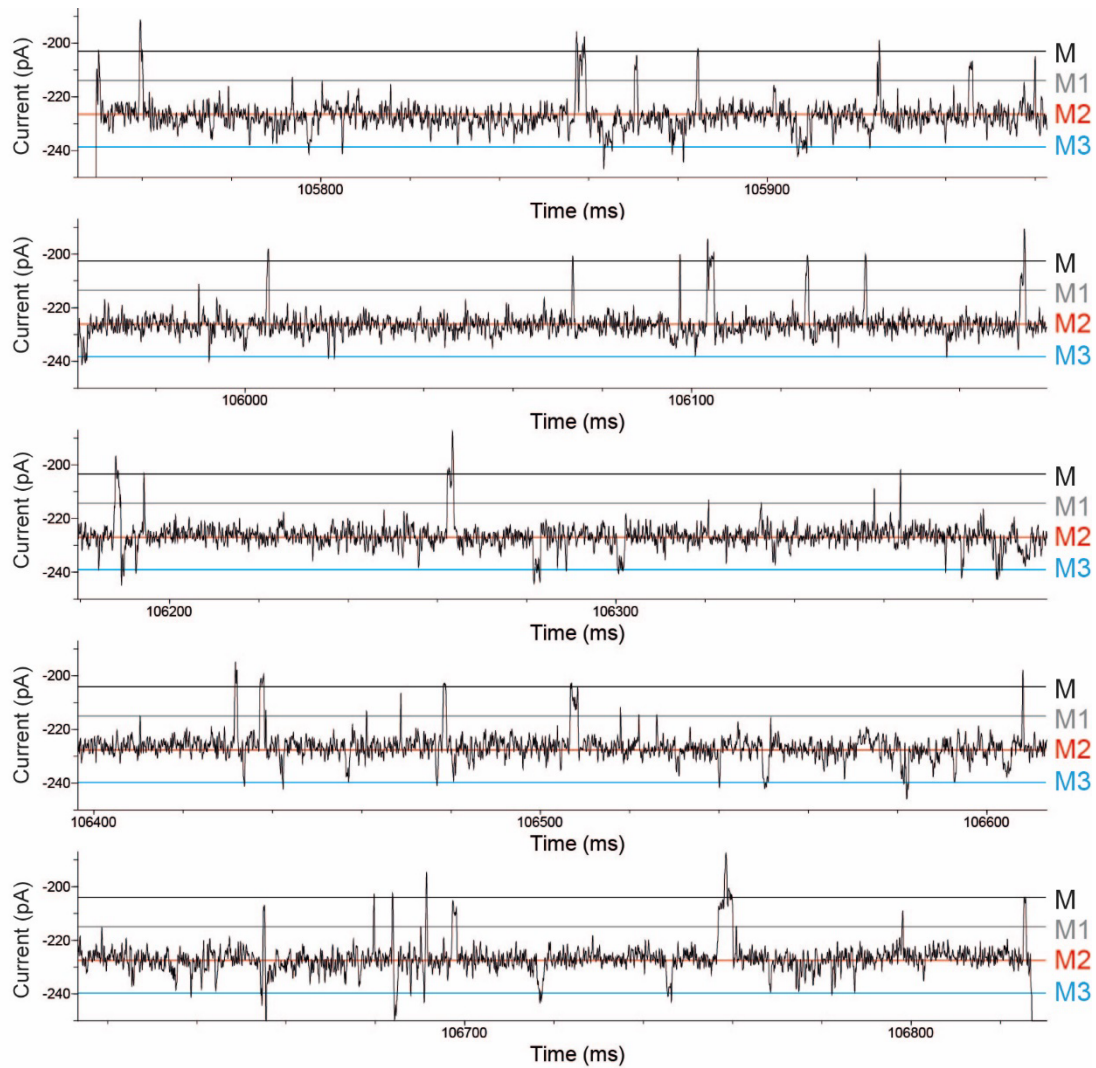

**Supplementary Figure 12. Continuous recording of AK<sub>2</sub><sup>+</sup> conformational changes during the binding of ATP and AMP.** ATP (1 mM) and AMP (1 mM) were added to the *trans* chamber. M and M1 represent the open conformation (black and grey line), M2 the protein with the LID domain closed (red line) and M3 with both the LID and NMP domain closed (blue line). The measurements were performed in 400 mM KCl, 15 mM Tris, 2 mM MgCl<sub>2</sub>, pH 7.5 at room temperature (22°C) applying -90 mV (*trans*) and sampling at 50 kHz with a 10 kHz Bessel-low filter, additionally digitally filtered with a 2 kHz Gaussian low-pass filter.

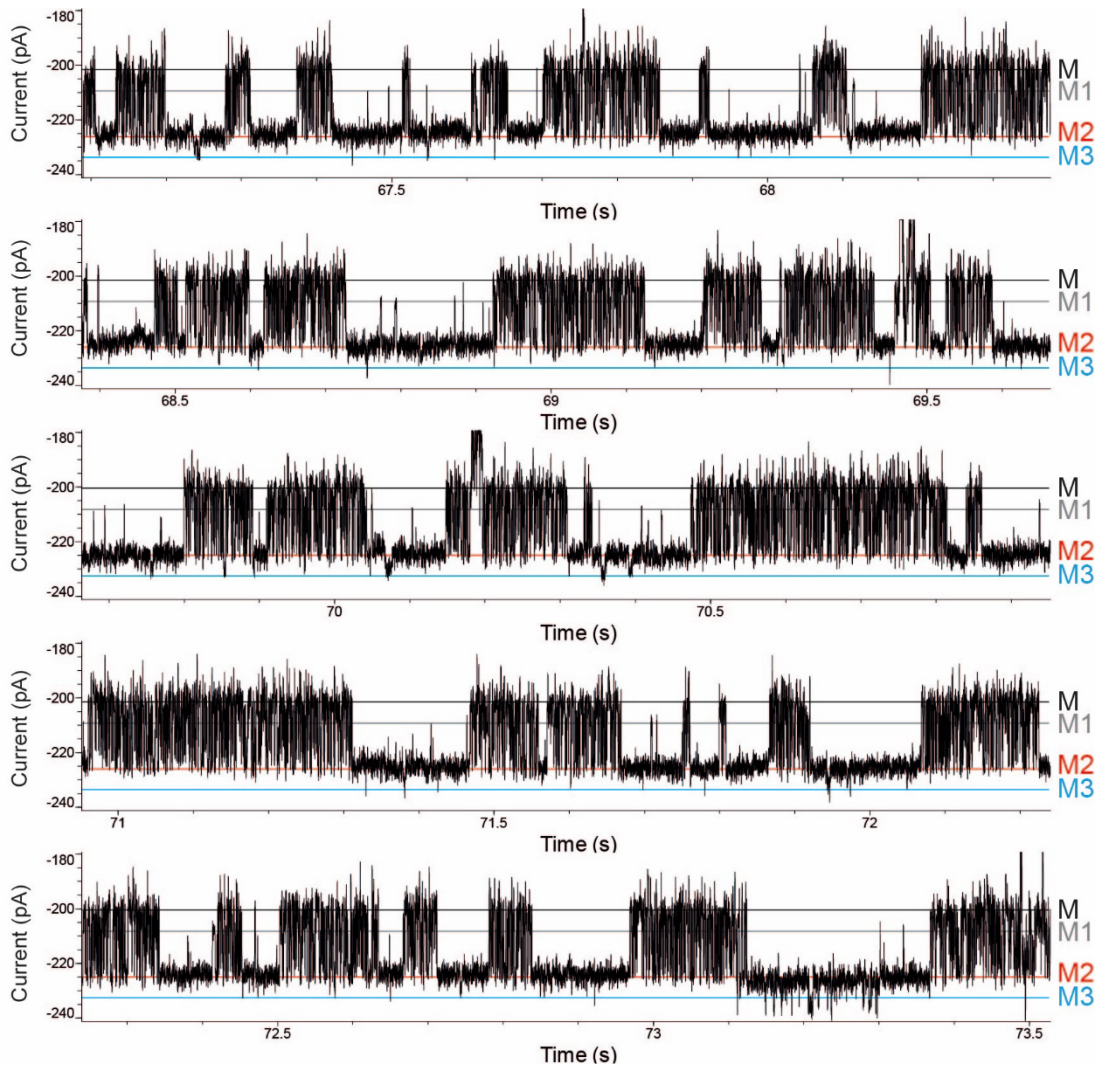

**Supplementary Figure 13. Continuous recording of AK<sub>2</sub><sup>+</sup> conformational changes during the binding of ATP and AMP without Mg<sup>2+</sup>.** ATP (1 mM) and AMP (1 mM) was added to the *trans* chamber. M and M1 represent the open conformation (black and grey line), M2 the protein with the LID domain closed (red line) and M3 with both the LID and NMP domain closed (blue line). The measurements were performed in 400 mM KCl, 15 mM Tris, 100  $\mu$ M EDTA, pH 7.5 at room temperature (22°C) applying -90 mV (*trans*) and sampling at 50 kHz with a 10 kHz Bessel-low filter, additionally digitally filtered with a 2 kHz Gaussian low-pass filter.

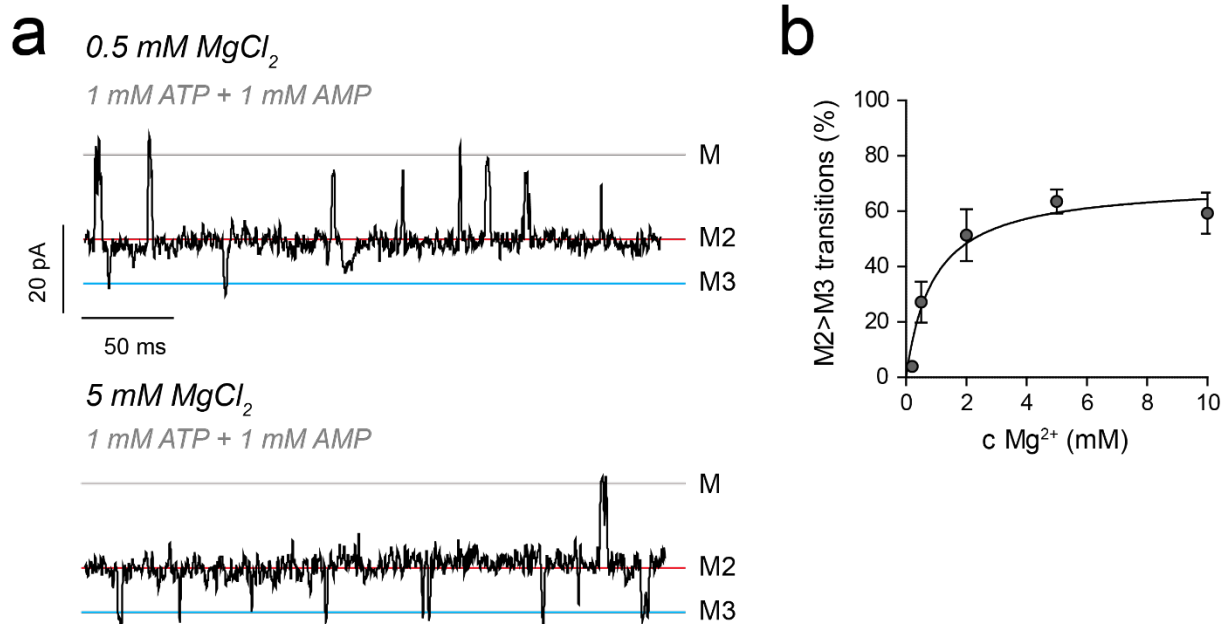

**Supplementary Figure 14. Mg<sup>2+</sup>-dependency of AK<sub>2</sub>+ binding behavior.** (a) Example traces of AK<sub>2</sub>+ (*cis*) with 1 mM ATP + 1 mM AMP (*trans*) at different Mg<sup>2+</sup> concentrations (*cis* and *trans*). Measurements were performed in 400 mM KCl, 15 mM Tris, 2 mM MgCl<sub>2</sub>, pH 7.5 with a -90 mV bias (*trans*), 50 kHz sampling rate and 10 kHz low-pass Bessel filtering. Traces were additionally digitally filtered with a 1 kHz Gaussian filter. (b) Amount of NMP closing events at 1 mM ATP + 1 mM AMP at increasing Mg<sup>2+</sup> concentrations determined from counting M3 events in relation to the sum of all events (M, M2 and M3). Percentage was fitted to a hill equation. Data points represent the mean ± SEM (n ≥ 3).



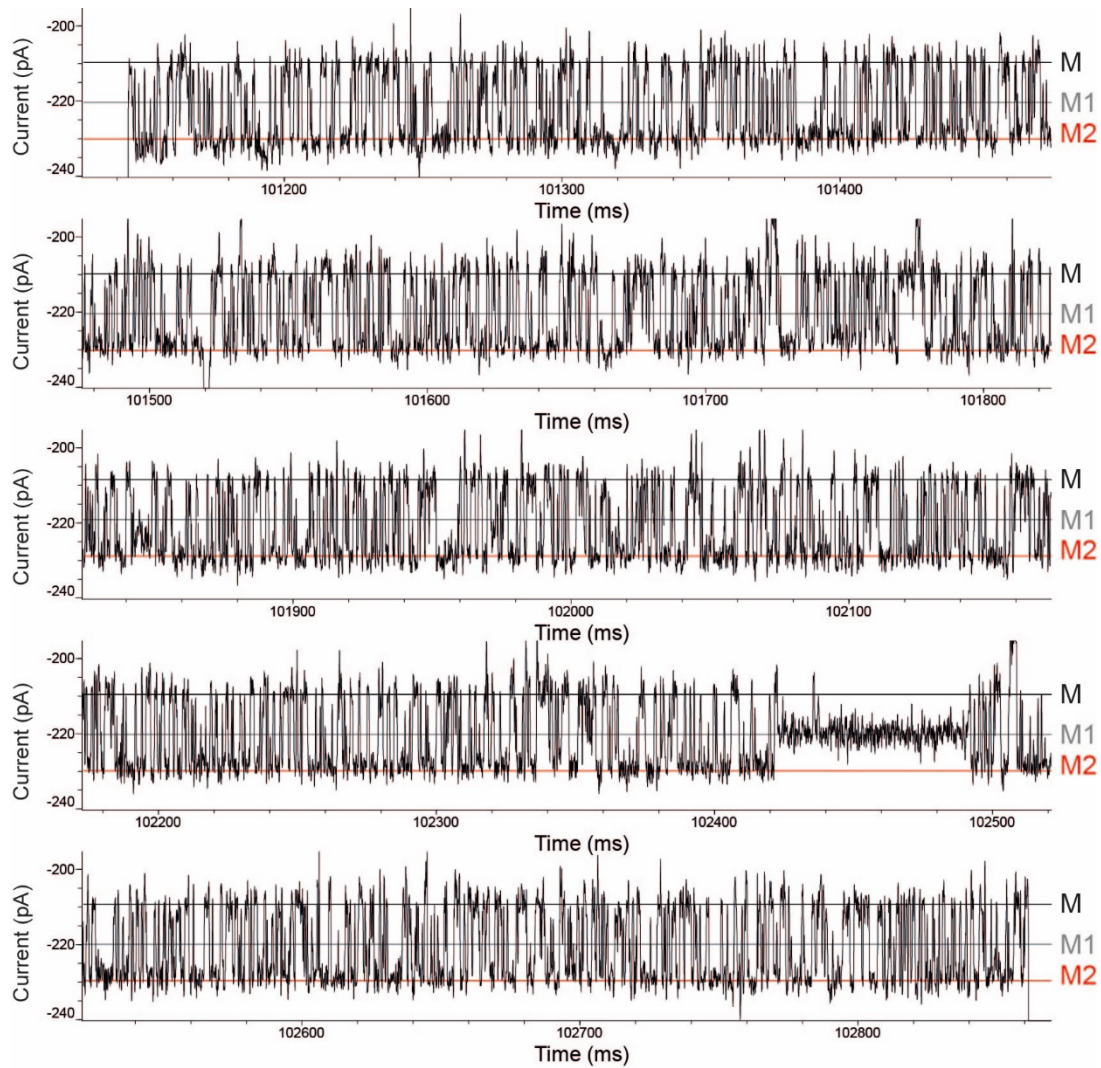

**Supplementary Figure 15. Continuous recording of R156A\_AK\_2+ conformational changes during the binding of ATP.** ATP (1 mM) was added to the *trans* chamber. M and M1 represent the open conformation (black and grey line) and M2 the protein with the LID domain closed (red line). The measurements were performed in 400 mM KCl, 15 mM Tris, 2 mM MgCl<sub>2</sub>, pH 7.5 at room temperature (22°C) applying -90 mV (*trans*) and sampling at 50 kHz with a 10 kHz Bessel-low filter, additionally digitally filtered with a 2 kHz Gaussian low-pass filter.

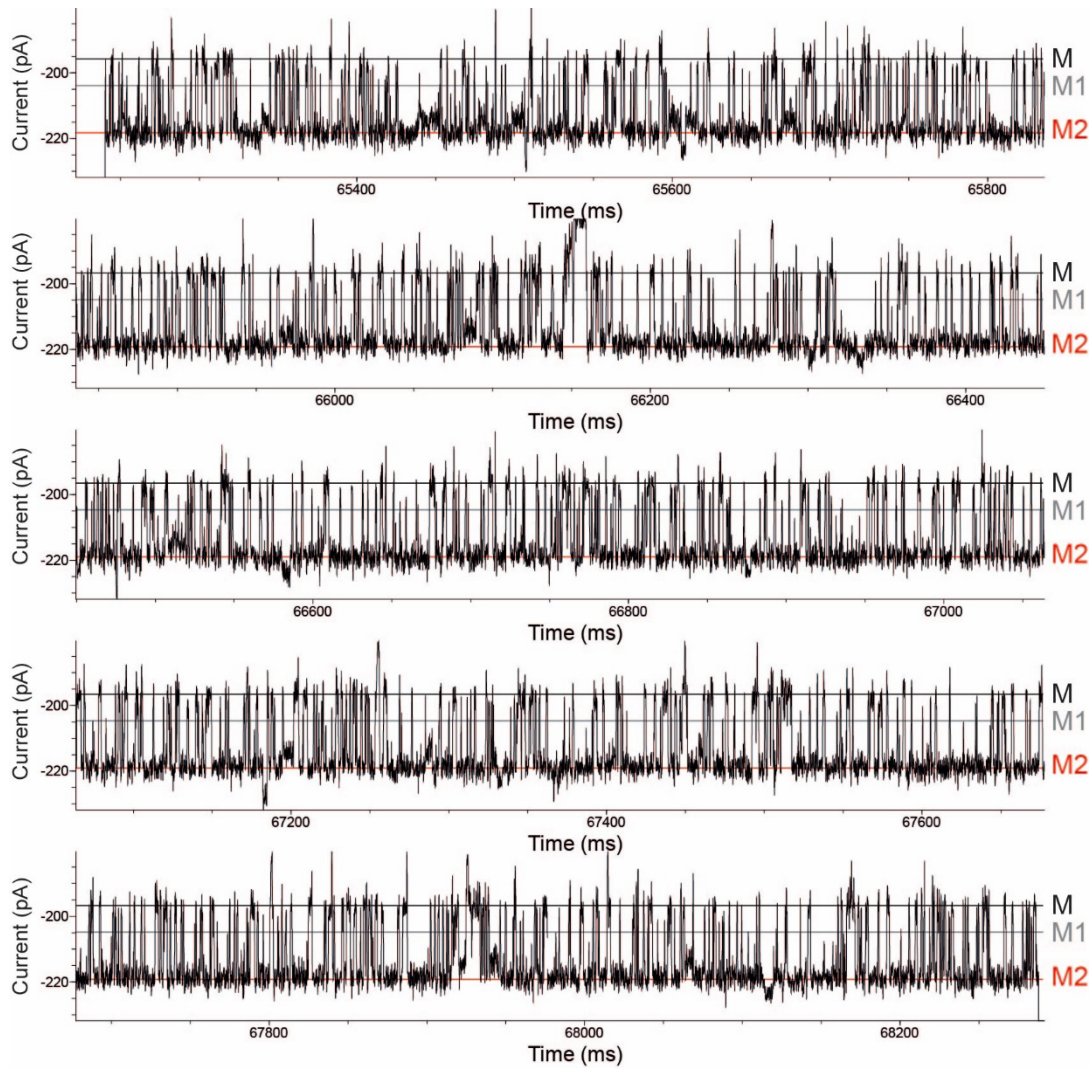

**Supplementary Figure 16. Continuous recording of R156A\_AK 2+ conformational changes during the binding of ATP and AMP.** ATP (1 mM) and AMP (1 mM) were added to the *trans* chamber. M and M1 represent the open conformation (black and grey line) and M2 the protein with the LID domain closed (red line). The measurements were performed in 400 mM KCl, 15 mM Tris, 2 mM MgCl<sub>2</sub>, pH 7.5 at room temperature (22°C) applying -90 mV (*trans*) and sampling at 50 kHz with a 10 kHz Bessel-low filter, additionally digitally filtered with a 2 kHz Gaussian low-pass filter.

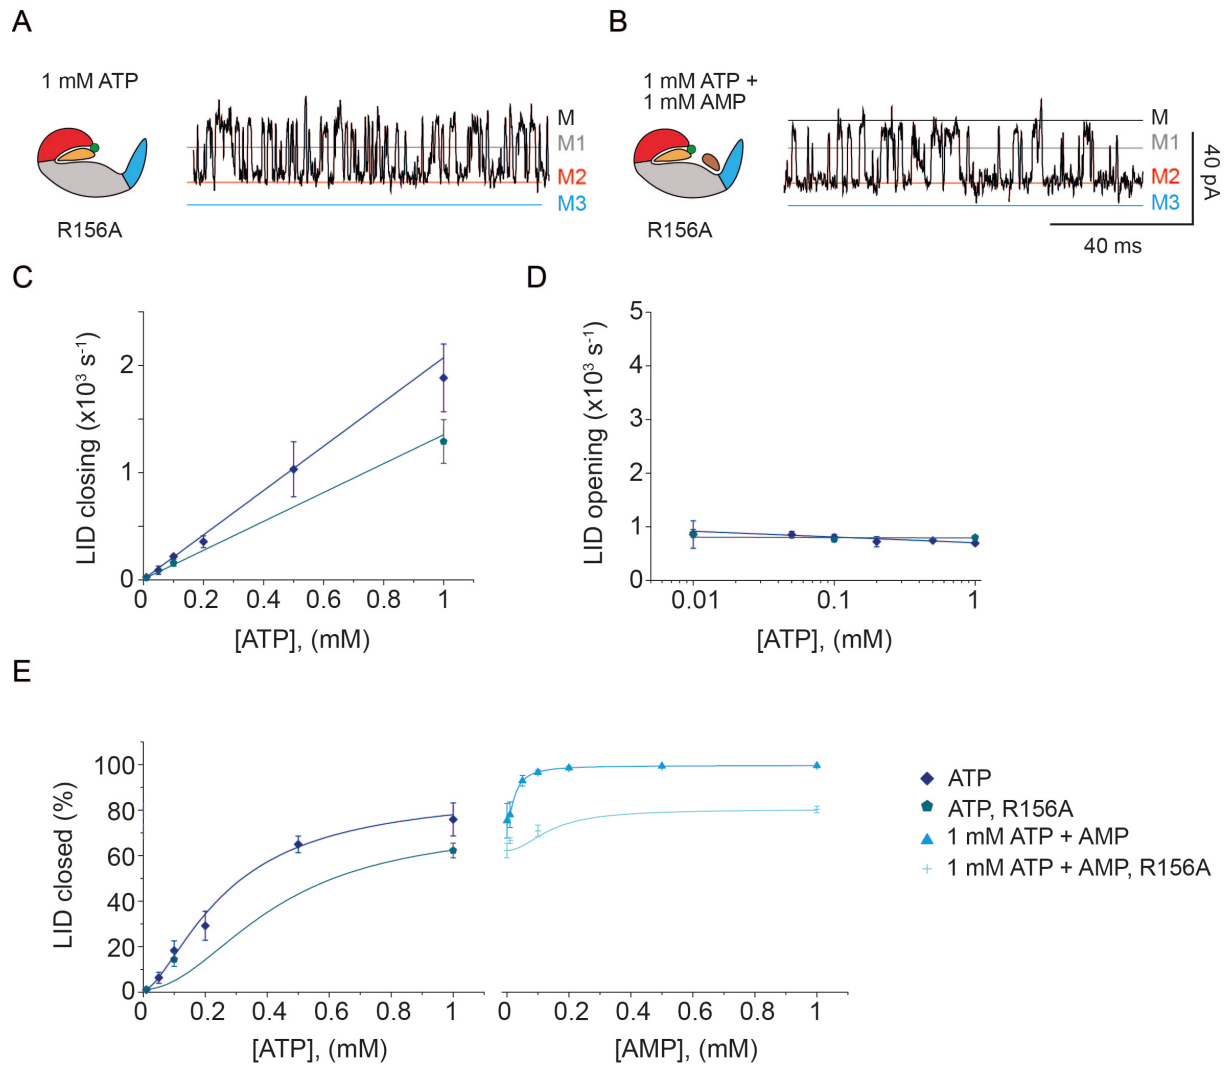

**Supplementary Figure 17. R156A\_AK\_2+ current blockades in the ClyA-AS nanopore upon binding of ATP and AMP.** (A-B) Typical blockades of R156A\_AK\_2+ in the presence of 1 mM ATP (A), and 1 mM ATP and 1 mM AMP (B). (C) Frequency of LID closing - measured as the inverse of dwell times - at increasing ATP concentrations. The line indicates a linear fit. (D) LID opening frequency at increasing ATP concentrations. The lines are fitting the data to a Hill equation. (E) Percentage of the closed LID domain at increasing ligand concentrations. The lines indicate fitting to a Hill function. The measurements were performed in 400 mM KCl, 15 mM Tris, 2 mM  $\text{MgCl}_2$ , pH 7.5 at room temperature (22°C) applying -90 mV (*trans*) and sampling at 50 kHz with a 10 kHz Bessel-low filter, additionally digitally filtered with a 2 kHz Gaussian low-pass filter. Ligands were added to the *trans* chamber and the enzyme to the *cis* chamber. Error bars in all graphs represents the standard deviation of the mean between independent experiments (N = 3).

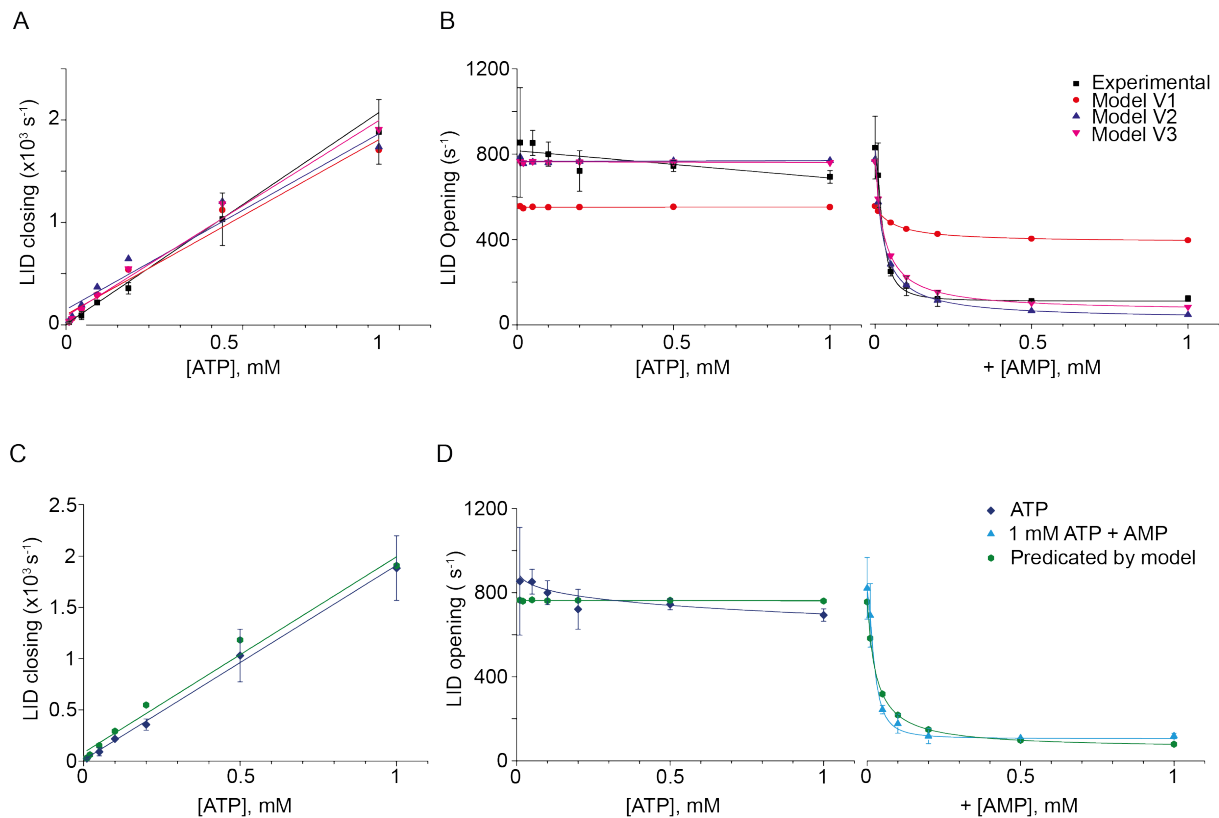

**Supplementary Figure 18 – Experimental and predicted kinetic values for binding of ATP and ATP + AMP to AK<sub>2</sub>+** **(A)** Frequency of LID closing - measured as the inverse of dwell times – at increasing ATP concentrations for different models and the experimental values. The lines indicate a linear fit. **(B)** LID opening frequency at increasing ATP concentrations for the different models tested and the experimental values. The lines are fitting the data to a Hill equation. **(C)** Frequency of LID closing - measured as the inverse of dwell times – at increasing ATP concentrations for model V3 and the experimental values. The lines indicate a linear fit. **(D)** LID opening frequency at increasing ATP concentrations for model V3 and the experimental values. The lines are fitting the data to a Hill equation. The measurements were performed in 400 mM KCl, 15 mM Tris, 2 mM MgCl<sub>2</sub>, pH 7.5 at room temperature (22°C) applying -90 mV (*trans*) and sampling at 50 kHz with a 10 kHz Bessel-low filter, additionally digitally filtered with a 2 kHz Gaussian low-pass filter. Ligands were added to the *trans* chamber and the enzyme to the *cis* chamber. Error bars in all graphs represents the standard deviation of the mean between independent experiments (N = 3).



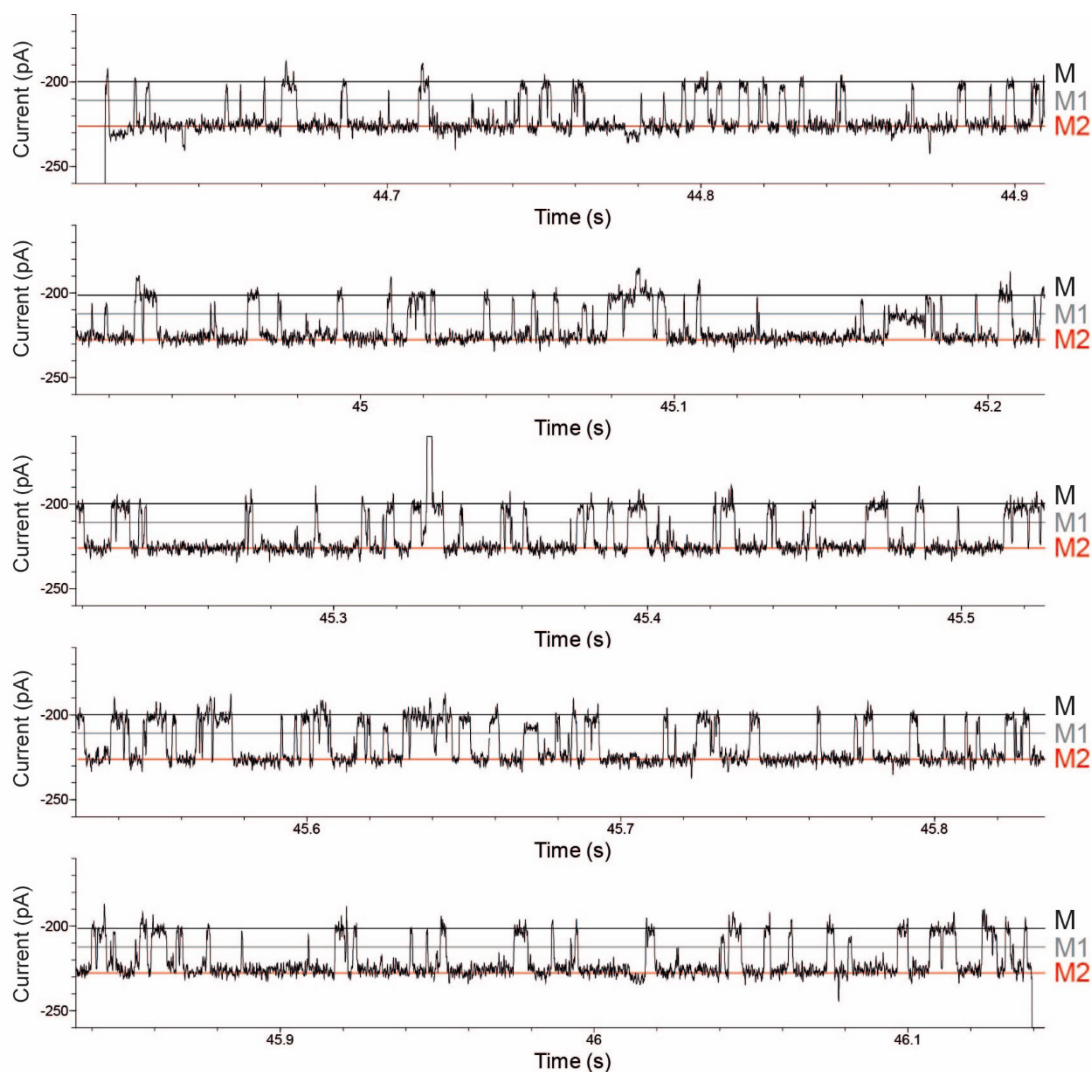

**Supplementary Figure 19. Continuous recording of AK<sub>2</sub><sup>+</sup> conformational changes during the binding of ADP type I.** ADP (100  $\mu$ M) was added to the *trans* chamber. M and M1 represent the open conformation (black and grey line) and M2 the protein with the LID domain closed (red line). The measurements were performed in 400 mM KCl, 15 mM Tris, 2 mM MgCl<sub>2</sub>, pH 7.5 at room temperature (22°C) applying -90 mV (*trans*) and sampling at 50 kHz with a 10 kHz Bessel-low filter, additionally digitally filtered with a 2 kHz Gaussian low-pass filter.

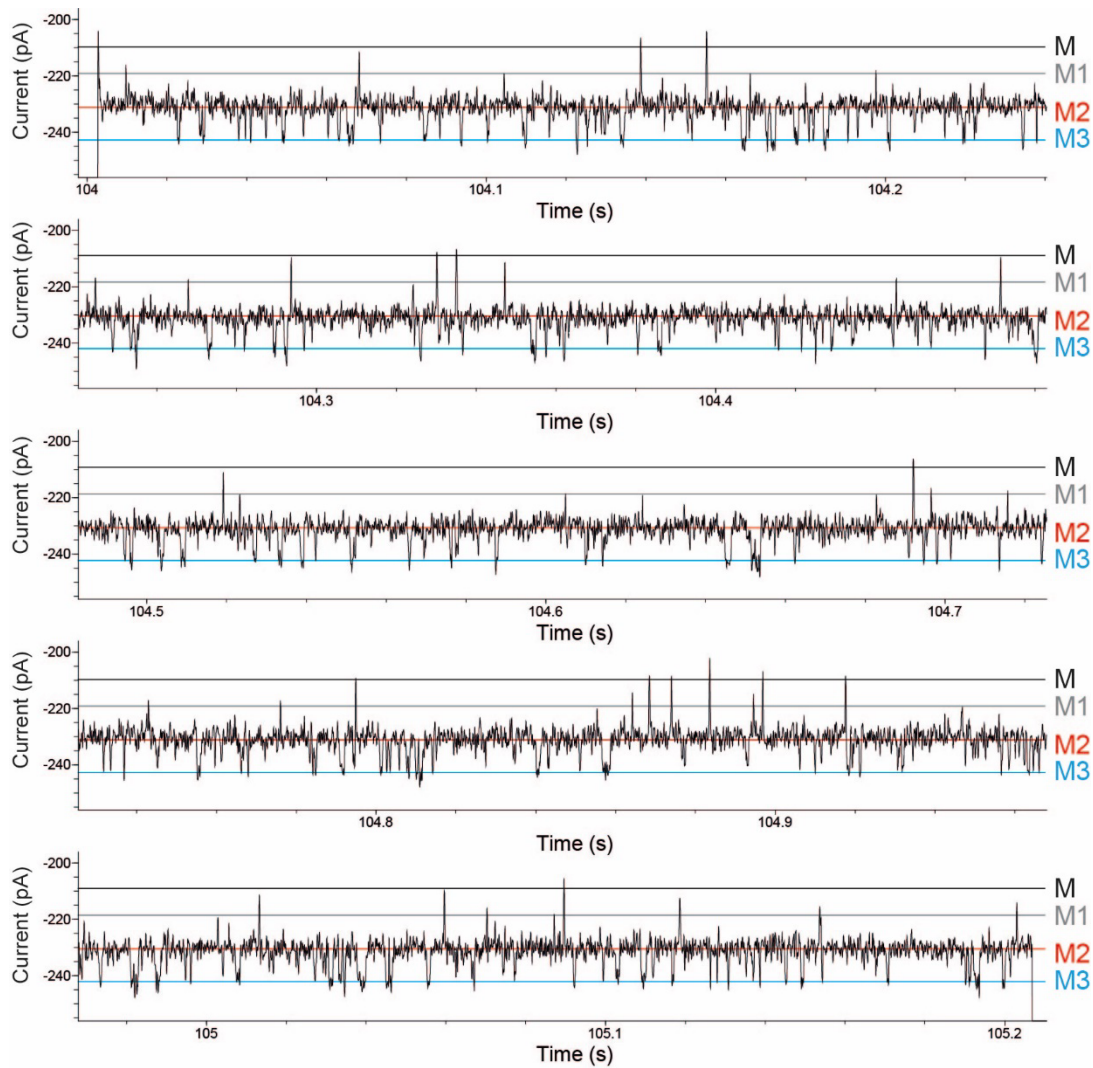

**Supplementary Figure 20. Continuous recording of AK<sub>2</sub><sup>+</sup> conformational changes during the binding of ADP type I.** ADP (1 mM) was added to the *trans* chamber. M and M1 represent the open conformation (black and grey line), M2 the protein with the LID domain closed (red line) and M3 with both the LID and NMP domain closed (blue line). The measurements were performed in 400 mM KCl, 15 mM Tris, 2 mM MgCl<sub>2</sub>, pH 7.5 at room temperature (22°C) applying -90 mV (*trans*) and sampling at 50 kHz with a 10 kHz Bessel-low filter, additionally digitally filtered with a 2 kHz Gaussian low-pass filter.

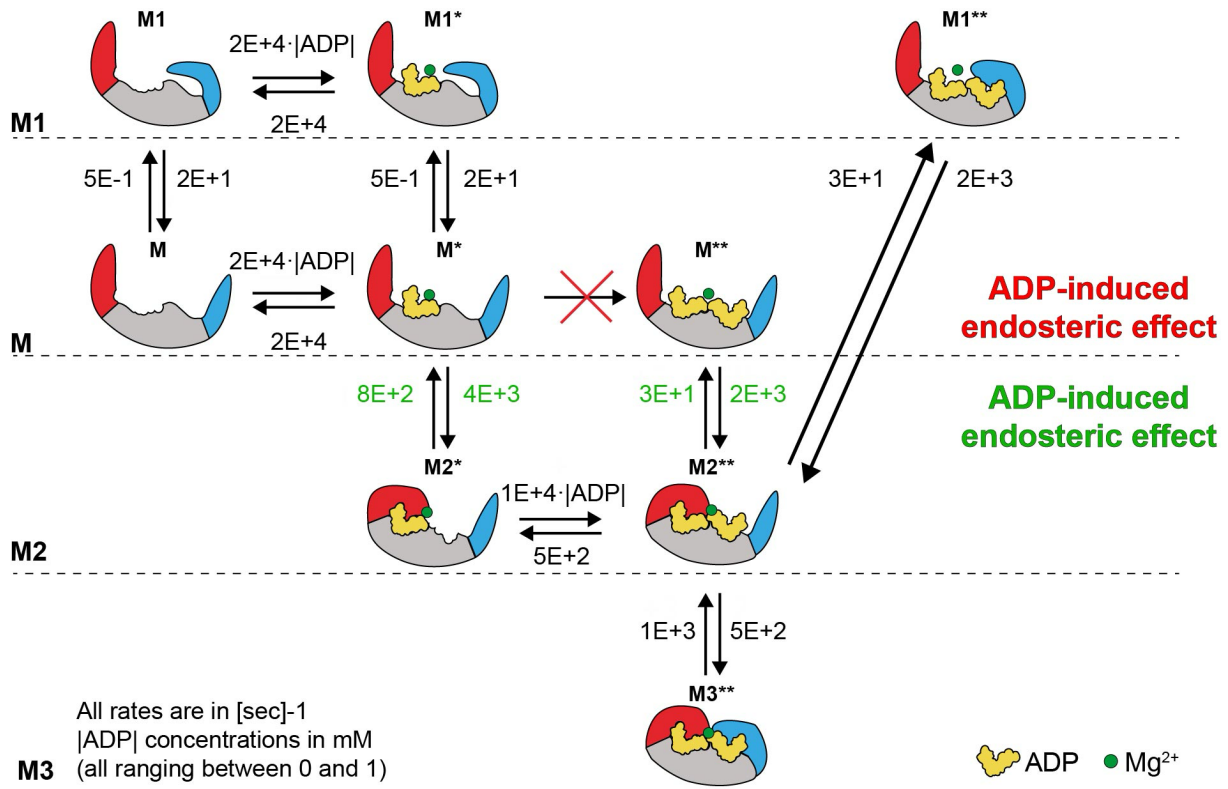

**Supplementary Figure 21. Kinetic model for the endosteric closing of the LID and NMP domain.** The model includes the four observed states for the LID and NMP domain, and the hidden ligand-bound states. The ADP-induced endosteric effect was implemented by removing the  $M^* \rightarrow M^{**}$  transition. The ADP-induced endosteric effect was implemented by allowing the  $M^* \leftrightarrow M2^*$  and  $M^{**} \leftrightarrow M2^{**}$  states to have different rates. The rates were retrieved by fitting the kinetic data to a Hidden Markov Model (HMM) based on the four observable states and using different ligand concentration. Confidence intervals for the estimated rates are given in Supplementary Table 11.

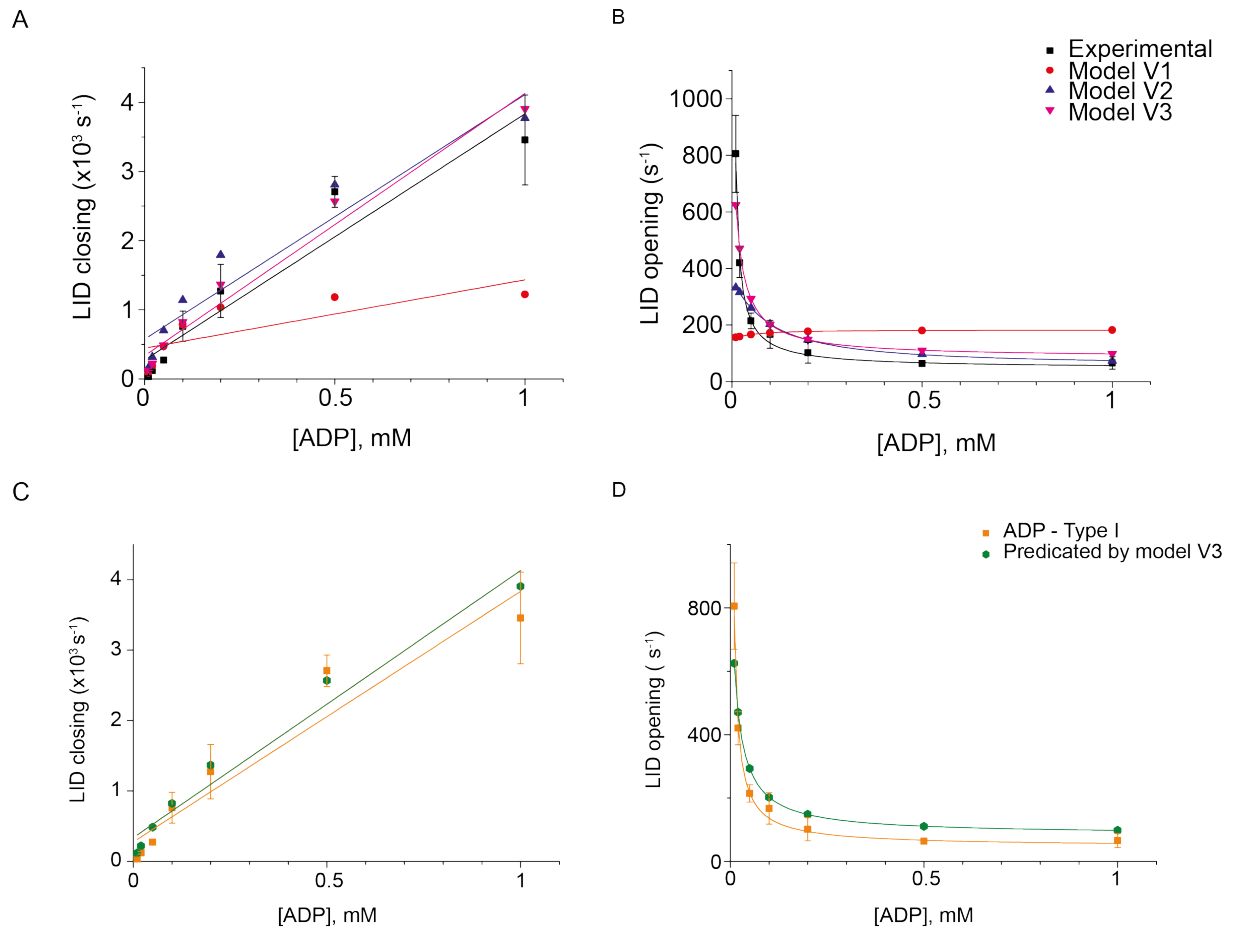

**Supplementary Figure 22 – Experimental and predicted kinetic values for binding of ADP type I to AK<sub>2</sub>+**. **(A)** Frequency of LID closing – measured as the inverse of dwell times – at increasing ADP concentrations for the different models. The lines indicate a linear fit. **(B)** LID opening frequency at increasing ADP concentrations for the different models. The lines are fitting the data to a Hill equation. **(C)** Frequency of LID closing – measured as the inverse of dwell times – at increasing ADP concentrations for the model V3 and the experimental values. The lines indicate a linear fit. **(D)** LID opening frequency at increasing ADP concentrations for model V3 and the experimental values. The lines are fitting the data to a Hill equation. The measurements were performed in 400 mM KCl, 15 mM Tris, 2 mM MgCl<sub>2</sub>, pH 7.5 at room temperature (22°C) applying -90 mV (*trans*) and sampling at 50 kHz with a 10 kHz Bessel-low filter, additionally digitally filtered with a 2 kHz Gaussian low-pass filter. Ligands were added to the *trans* chamber and the enzyme to the *cis* chamber. Error bars in all graphs represents the standard deviation of the mean between independent experiments (N = 3).

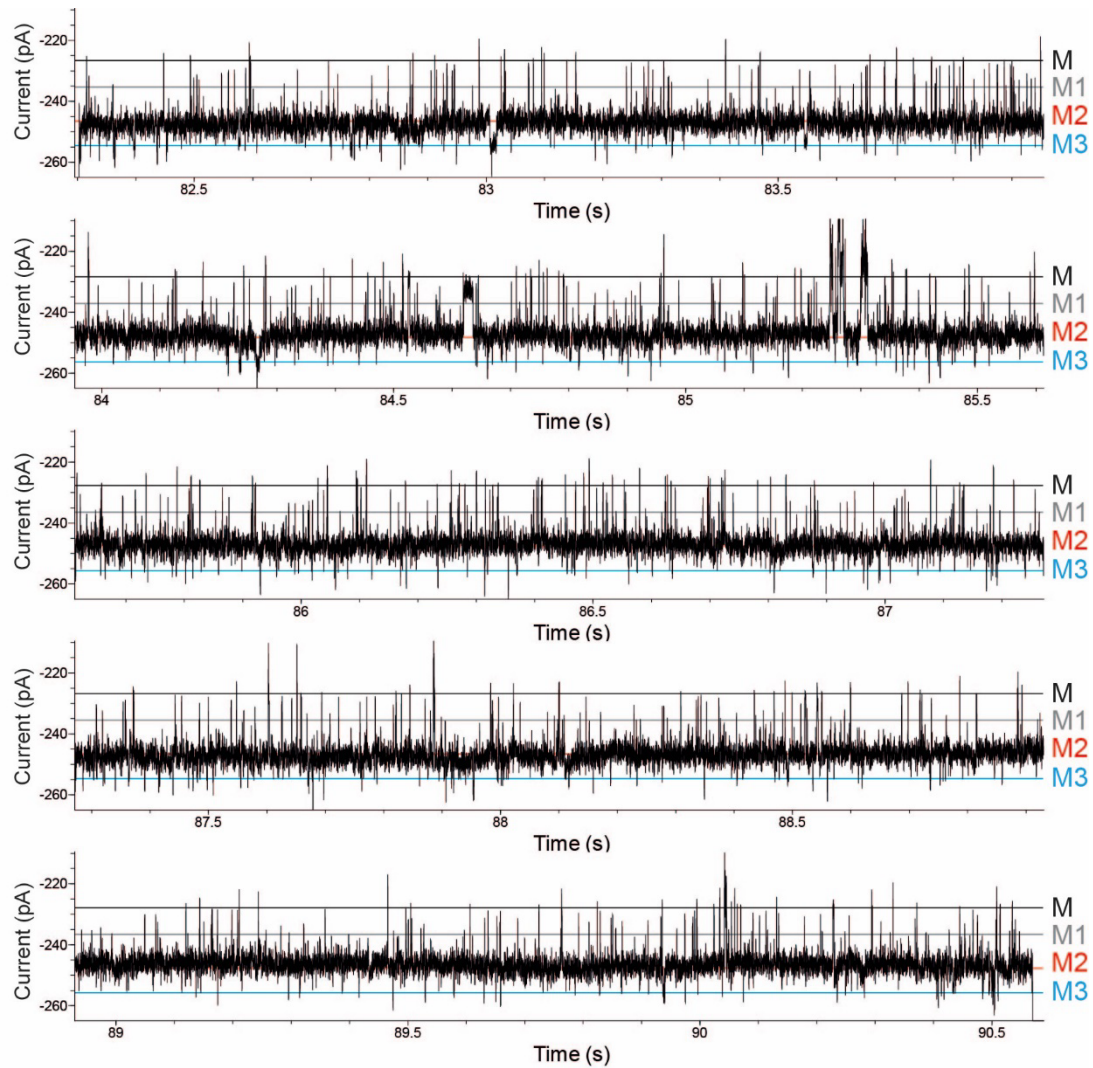

**Supplementary Figure 23. Continuous recording of AK<sub>2</sub><sup>+</sup> conformational changes during the binding of ADP type I without Mg<sup>2+</sup>.** ADP (1 mM) was added to the *trans* chamber. M and M1 represent the open conformation (black and grey line), M2 the protein with the LID domain closed (red line) and M3 with both the LID and NMP domain closed (blue line). The measurements were performed in 400 mM KCl, 15 mM Tris, 100  $\mu$ M EDTA, pH 7.5 at room temperature (22°C) applying -90 mV (*trans*) and sampling at 50 kHz with a 10 kHz Bessel-low filter, additionally digitally filtered with a 2 kHz Gaussian low-pass filter.

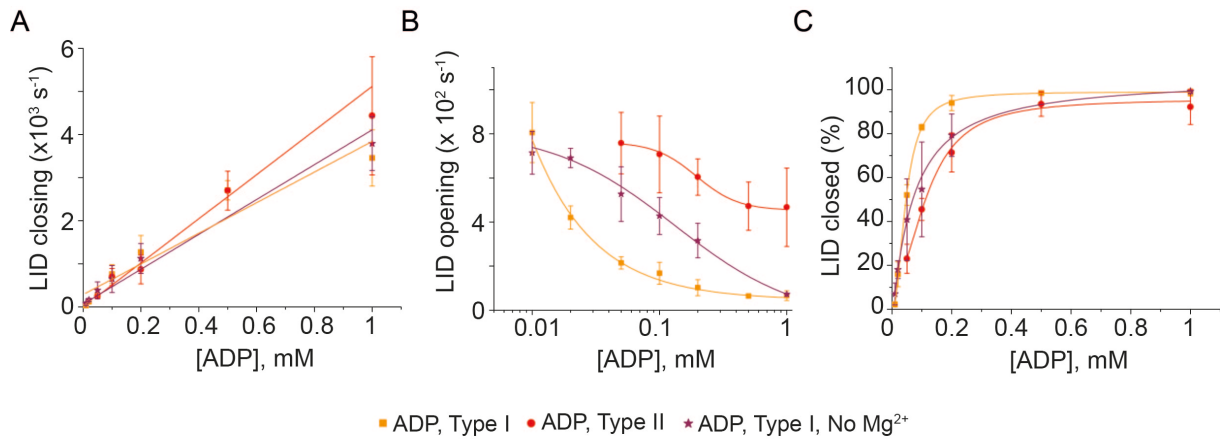

**Supplementary Figure 24. AK<sub>2</sub>+ kinetics in the ClyA-AS nanopore upon binding of ADP without magnesium.** (a) LID closing frequency - measured as the inverse of dwell times – at increasing ATP concentrations. The lines indicate a linear fit. (b) LID opening frequency at increasing ADP concentrations. The lines indicate a Hill equation fit. (c) Percentage of the closed LID at increasing ligand concentrations. The lines indicate a Hill equation fit. The measurements were performed in 400 mM KCl, 15 mM Tris, pH 7.5 at room temperature (22°C) applying -90 mV (*trans*) and sampling at 50 kHz with a 10 kHz Bessel-low filter, additionally digitally filtered with a 2 kHz Gaussian low-pass filter. Ligands were added to the *trans* chamber and the enzyme to the *cis* chamber. Error bars in all graphs represents the standard deviation of the mean between independent experiments (N = 3).



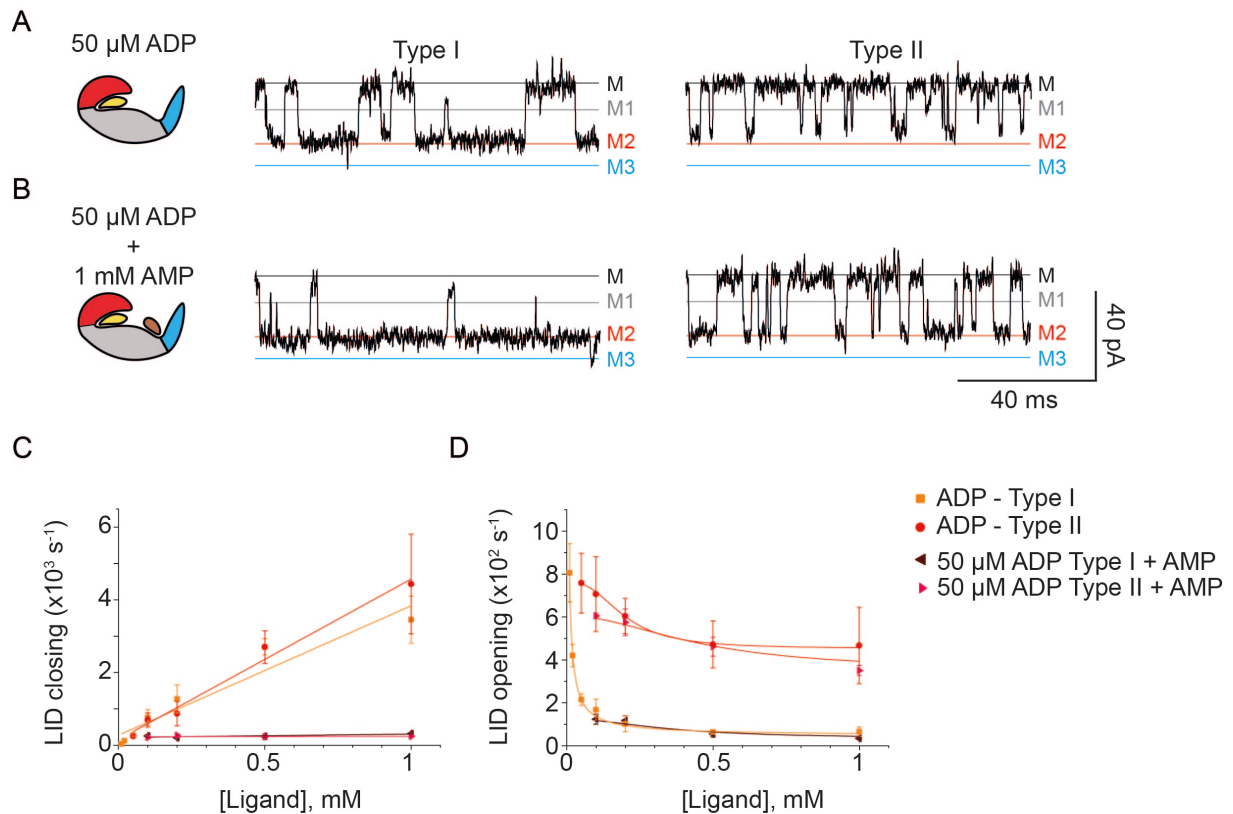

**Supplementary Figure 25: Ligand binding behavior of AK<sub>2</sub>+ with ADP and AMP.** (A) Expansions of typical ionic current blockades provoked by the capture of a single AK<sub>2</sub>+ molecule in the presence of 50  $\mu\text{M}$  ADP and (B) in the presence of 50  $\mu\text{M}$  ADP and 1 mM AMP (both *trans*). (C) LID closing frequency - measured as the inverse of dwell times - at increasing ATP concentrations. The lines indicate a linear fit. (D) LID opening frequency at increasing ADP concentrations. The lines indicate a Hill equation fit. The measurements were performed in 400 mM KCl, 15 mM Tris, 2 mM MgCl<sub>2</sub>, pH 7.5 at room temperature (22°C) applying -90 mV (*trans*) and sampling at 50 kHz with a 10 kHz Bessel-low filter, additionally digitally filtered with a 2 kHz Gaussian low-pass filter. Error bars for all graphs represents the standard deviation of the mean between independent experiments (N = 3).

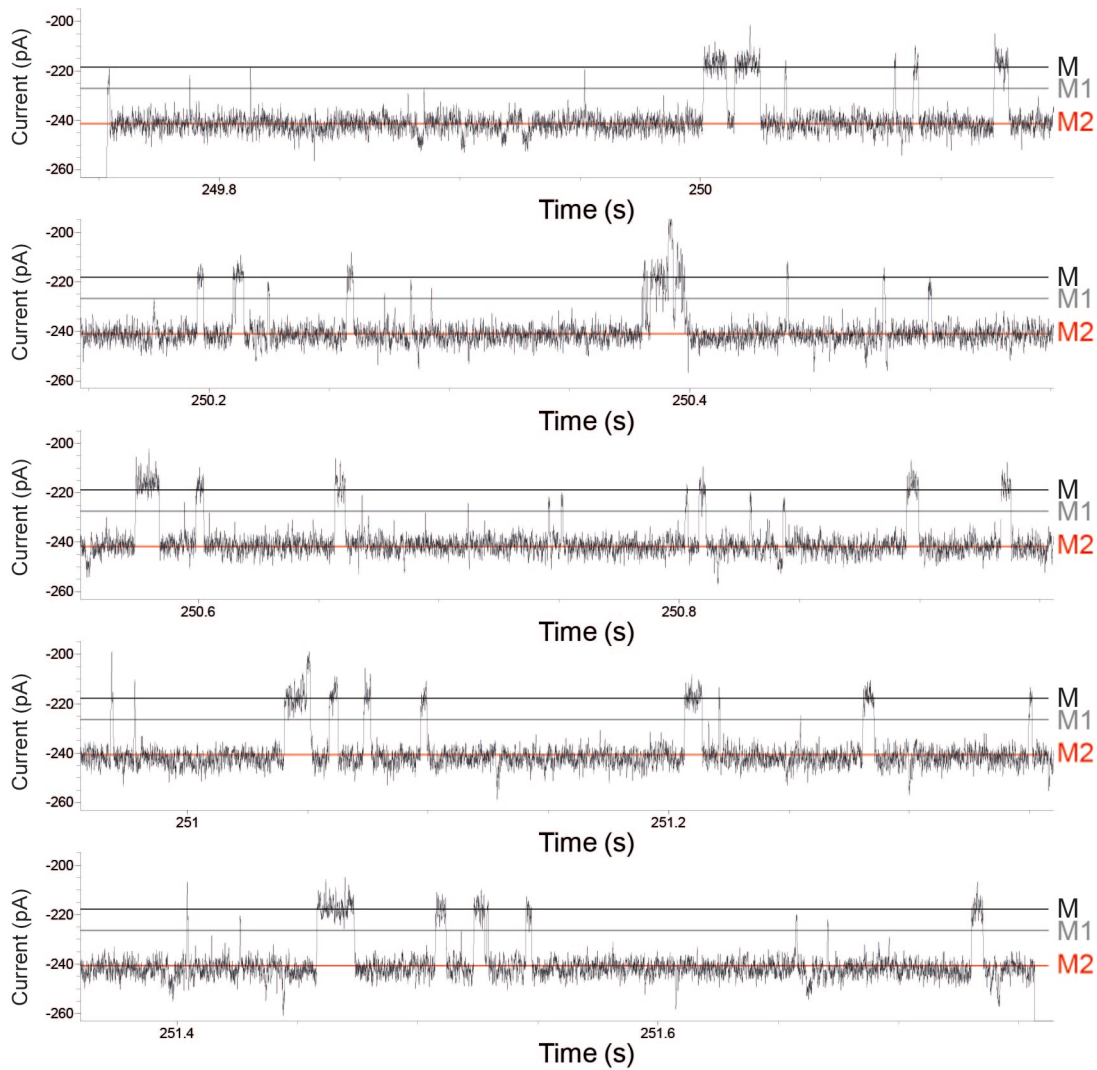

**Supplementary Figure 26: Continuous recording of AK<sub>2</sub><sup>+</sup> conformational changes during the binding of ADP type I and AMP.** ADP (50  $\mu$ M) and AMP (1 mM) were added to the *trans* chamber. M and M1 represent the open conformation (black and grey line) and M2 the protein with the LID domain closed (red line). The measurements were performed in 400 mM KCl, 15 mM Tris, 2 mM MgCl<sub>2</sub>, pH 7.5 at room temperature (22°C) applying -90 mV (*trans*) and sampling at 50 kHz with a 10 kHz Bessel-low filter, additionally digitally filtered with a 2 kHz Gaussian low-pass filter.



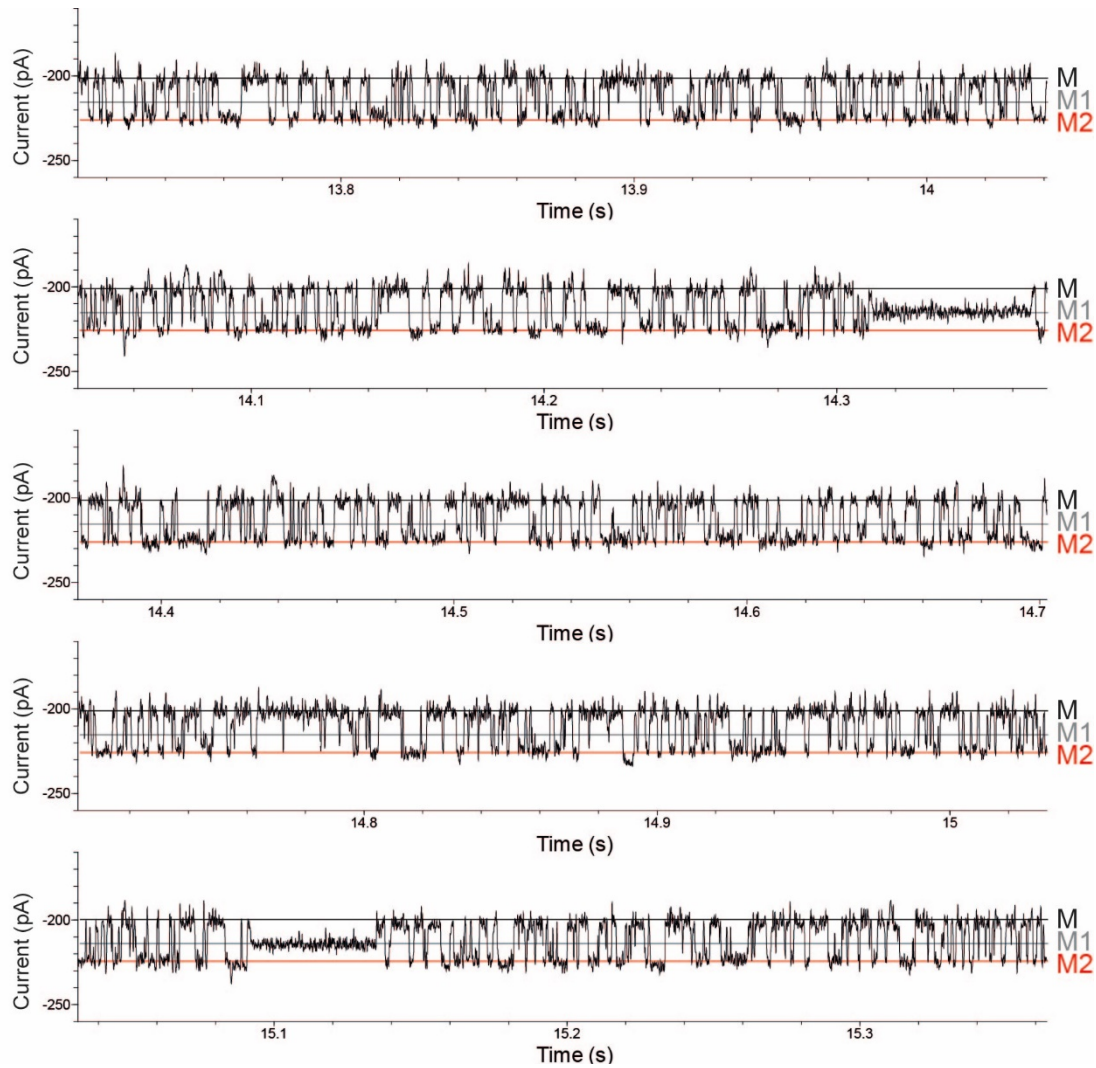

**Supplementary Figure 27. Continuous recording of AK<sub>2</sub><sup>+</sup> conformational changes during the binding of ADP type II.** ADP (100  $\mu$ M) was added to the *trans* chamber. M and M1 represent the open conformation (black and grey line) and M2 the protein with the LID domain closed (red line). The measurements were performed in 400 mM KCl, 15 mM Tris, 2 mM MgCl<sub>2</sub>, pH 7.5 at room temperature (22°C) applying -90 mV (*trans*) and sampling at 50 kHz with a 10 kHz Bessel-low filter, additionally digitally filtered with a 2 kHz Gaussian low-pass filter.

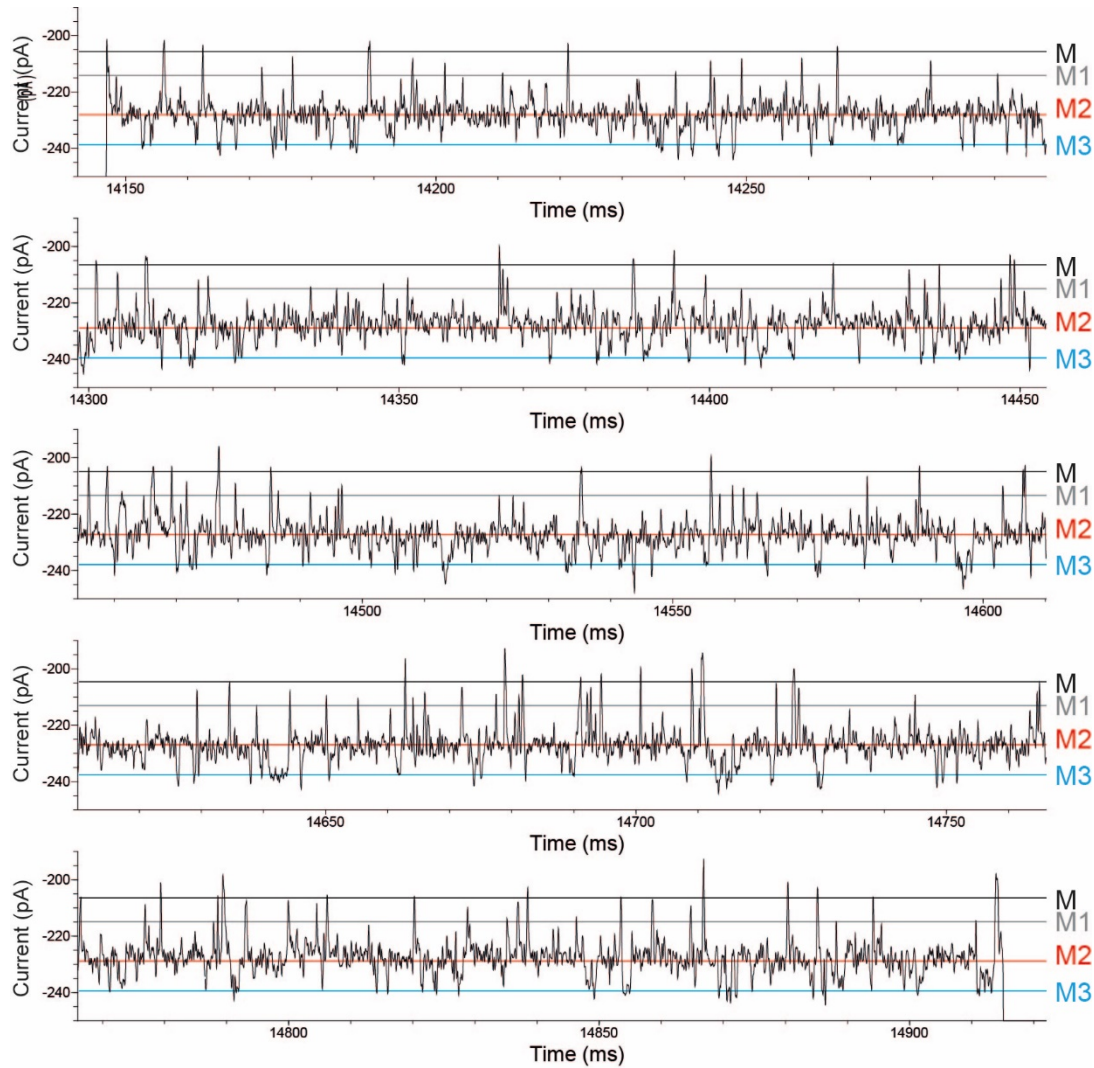

**Supplementary Figure 28. Continuous recording of AK<sub>2</sub><sup>+</sup> conformational changes during the binding of ADP type II.** ADP (1 mM) was added to the *trans* chamber. M and M1 represent the open conformation (black and grey line), M2 the protein with the LID domain closed (red line) and M3 with both the LID and NMP domain closed (blue line). The measurements were performed in 400 mM KCl, 15 mM Tris, 2 mM MgCl<sub>2</sub>, pH 7.5 at room temperature (22°C) applying -90 mV (*trans*) and sampling at 50 kHz with a 10 kHz Bessel-low filter, additionally digitally filtered with a 2 kHz Gaussian low-pass filter.

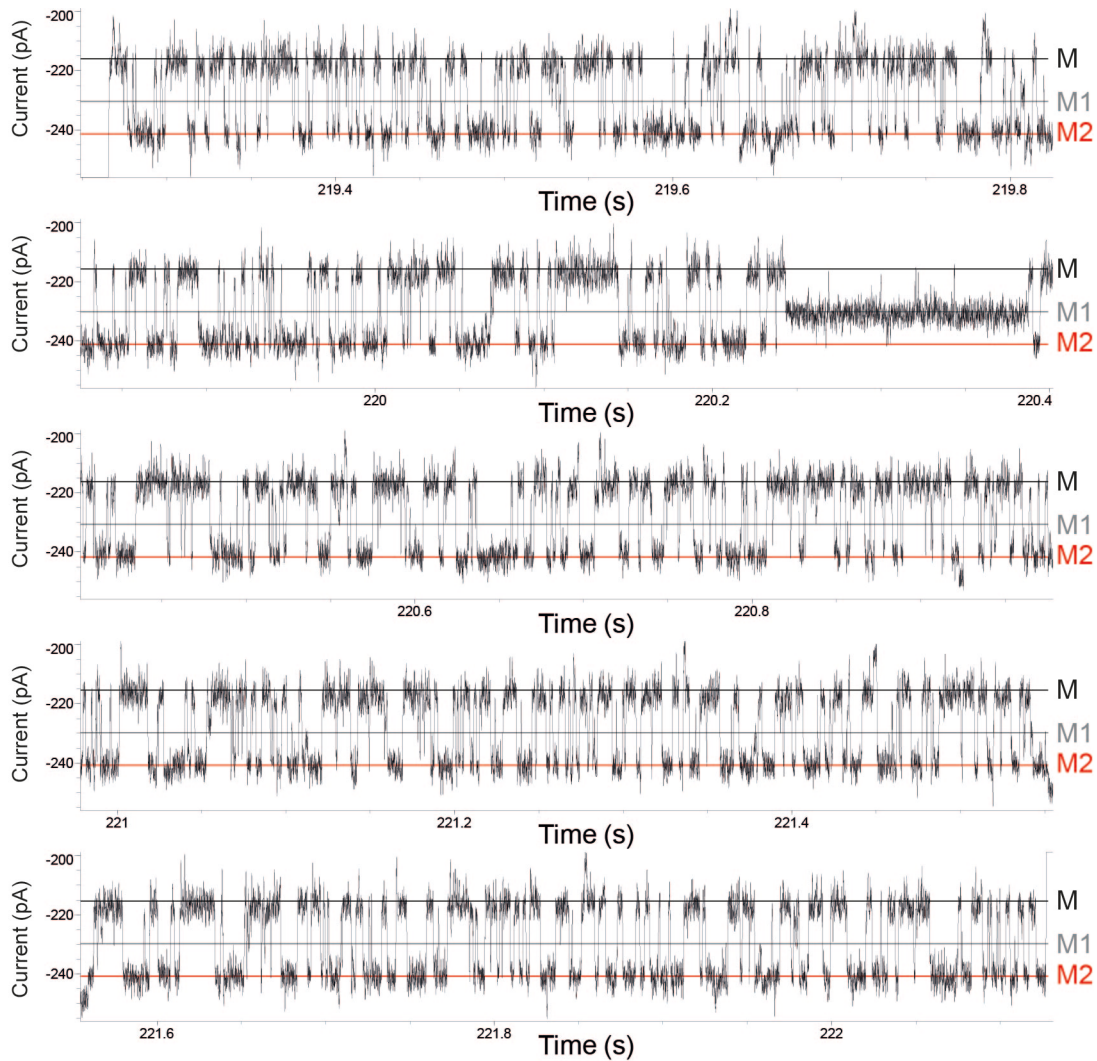

**Supplementary Figure 29: Continuous recording of AK<sub>2</sub><sup>+</sup> conformational changes during the binding of ADP type II and AMP.** ADP (50  $\mu$ M) and AMP (1 mM) were added to the *trans* chamber. M and M1 represent the open conformation (black and grey line) and M2 the protein with the LID domain closed (red line). The measurements were performed in 400 mM KCl, 15 mM Tris, 2 mM MgCl<sub>2</sub>, pH 7.5 at room temperature (22°C) applying -90 mV (*trans*) and sampling at 50 kHz with a 10 kHz Bessel-low filter, additionally digitally filtered with a 2 kHz Gaussian low-pass filter.

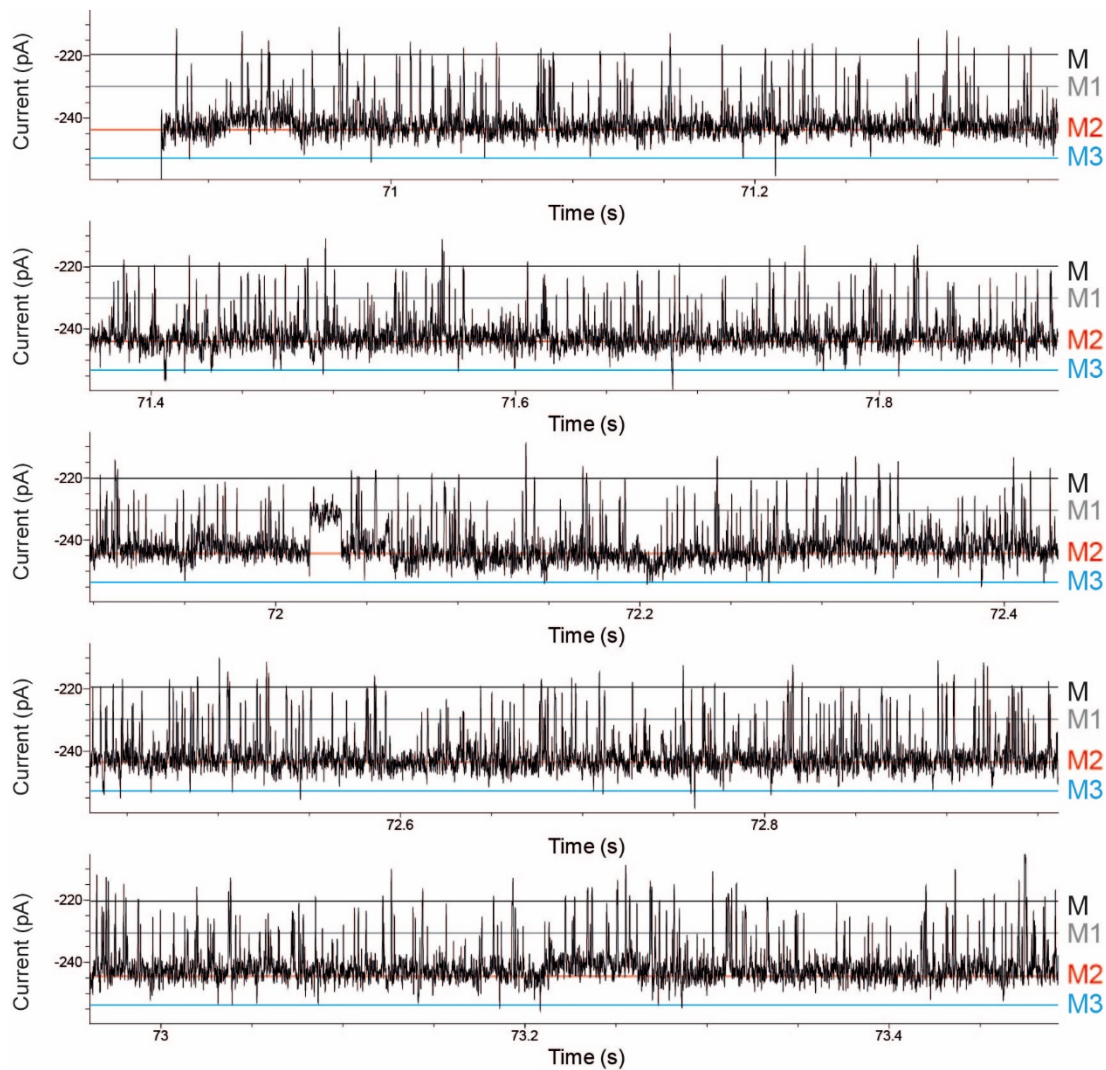

**Supplementary Figure 30. Continuous recording of AK<sub>2</sub><sup>+</sup> conformational changes during the binding of ADP type II without Mg<sup>2+</sup>.** ADP (1 mM) was added to the *trans* chamber. M and M1 represent the open conformation (black and grey line), M2 the protein with the LID domain closed (red line) and M3 with both the LID and NMP domain closed (blue line). The measurements were performed in 400 mM KCl, 15 mM Tris, 100  $\mu$ M EDTA, pH 7.5 at room temperature (22°C) applying -90 mV (*trans*) and sampling at 50 kHz with a 10 kHz Bessel-low filter, additionally digitally filtered with a 2 kHz Gaussian low-pass filter.



**Supplementary Table 1.** Results of AK bulk activity assay.

|       | $K_M$<br>( $\mu\text{M}$ ) | $V_{\max}$<br>( $\mu\text{M}/\text{min}$ ) | Hill<br>coefficient | $K_{\text{cat}}$<br>( $\text{s}^{-1}$ ) |
|-------|----------------------------|--------------------------------------------|---------------------|-----------------------------------------|
| AK-WT | 261 $\pm$ 106              | 54 $\pm$ 14                                | 1.6 $\pm$ 0.6       | 30 $\pm$ 8                              |
| AK_2+ | 195 $\pm$ 8                | 34 $\pm$ 1                                 | 2.1 $\pm$ 0.1       | 18.9 $\pm$ 0.6                          |

**Supplementary Table 2:** Table with current blockades of AK\_2+ upon addition of ligand. Errors are given as standard deviation of the mean between independent pores ( $N = 3$ ) All current levels were collected in 400 mM KCl, 15 mM Tris, 2 mM  $\text{MgCl}_2$ , pH 7.5 at room temperature (22°C) applying -90 mV (*trans*).

| Level         | Ligand           | $I_{\text{res}}$<br>(%) | $\Delta I_{\text{res}}$<br>(%) | $\Delta I_{\text{res}}$<br>(pA) |
|---------------|------------------|-------------------------|--------------------------------|---------------------------------|
| M1            |                  | 49.2 $\pm$ 0.1          | 3.2 $\pm$ 0.3                  | 13.6 $\pm$ 0.7                  |
| M2            | <b>AMP</b>       | 51.8 $\pm$ 0.1          | 5.7 $\pm$ 0.2                  | 24.3 $\pm$ 0.9                  |
| M2            | <b>ATP</b>       | 52.0 $\pm$ 0.1          | 5.7 $\pm$ 0.4                  | 25.4 $\pm$ 1.9                  |
| M3            | <b>ATP + AMP</b> | 54.5 $\pm$ 0.2          | 7.3 $\pm$ 0.1                  | 32.1 $\pm$ 1.4                  |
| M2            | <b>ADP</b>       | 51.8 $\pm$ 0.2          | 5.4 $\pm$ 0.2                  | 23.8 $\pm$ 0.6                  |
| M3            | <b>ADP</b>       | 54.3 $\pm$ 0.2          | 7.5 $\pm$ 0.6                  | 33.2 $\pm$ 0.3                  |
| M2<br>Type I  | <b>ADP</b>       | 51.5 $\pm$ 0.4          | 5.1 $\pm$ 0.2                  | 22.3 $\pm$ 0.9                  |
| M3<br>Type II | <b>ADP</b>       | 53.5 $\pm$ 0.8          | 7.8 $\pm$ 1.8                  | 31.4 $\pm$ 3.8                  |
| M             | <b>Ap5A</b>      | 46.4 $\pm$ 0.2          | /                              | /                               |
| M1            |                  | 48.7 $\pm$ 0.2          | 2.3 $\pm$ 0.2                  | 10.4 $\pm$ 0.4                  |
| M2            |                  | 51.0 $\pm$ 0.1          | 4.6 $\pm$ 0.1                  | 20.6 $\pm$ 0.8                  |
| M3            |                  | 53.8 $\pm$ 0.1          | 7.4 $\pm$ 0.1                  | 32.5 $\pm$ 1.0                  |
| M4            |                  | 56.6 $\pm$ 0.2          | 10.2 $\pm$ 0.1                 | 45.1 $\pm$ 0.6                  |

**Supplementary Table 3.** AK<sub>2</sub><sup>+</sup> binding behavior in the ClyA-AS nanopore with ATP with their individual values obtained in this study. Errors are given as standard deviation of the mean between independent pores ( $N \geq 3$ ). All current levels were collected in 400 mM KCl, 15 mM Tris, 2 mM MgCl<sub>2</sub> (unless omitted), pH 7.5 at room temperature (22°C) applying -90 mV (*trans*).

| Concentration ligand (μM)<br>ATP | On rate (s <sup>-1</sup> )                        | Off rate (s <sup>-1</sup> )                        | Lid closed (%)                        |
|----------------------------------|---------------------------------------------------|----------------------------------------------------|---------------------------------------|
| 10                               | 25.6 ± 7.2                                        | 854.3 ± 256.5                                      | 1.0 ± 0.6                             |
| 50                               | 90.8 ± 38.9                                       | 852.5 ± 59.1                                       | 6.4 ± 2.4                             |
| 100                              | 218.0 ± 7.9                                       | 799.8 ± 57.0                                       | 18.3 ± 4.2                            |
| 200                              | 356.2 ± 54.8                                      | 721.4 ± 94.9                                       | 29.2 ± 6.4                            |
| 500                              | 1031.0 ± 257.0                                    | 744.5 ± 25.8                                       | 65.0 ± 3.6                            |
| 1000                             | 1883.9 ± 315.2                                    | 693.4 ± 29.6                                       | 75.9 ± 7.3                            |
| Concentration ligand (μM)<br>ATP | On rate (s <sup>-1</sup> )<br>No Mg <sup>2+</sup> | Off rate (s <sup>-1</sup> )<br>No Mg <sup>2+</sup> | Lid closed (%)<br>No Mg <sup>2+</sup> |
| 10                               | -                                                 | -                                                  | -                                     |
| 50                               | 77.6 ± 42.2                                       | 4165.0 ± 439.1                                     | 0.6 ± 0.1                             |
| 100                              | 221.8 ± 38.1                                      | 4797.4 ± 198.4                                     | 1.6 ± 0.1                             |
| 200                              | 339.9 ± 88.1                                      | 4312.5 ± 156.6                                     | 2.8 ± 0.7                             |
| 500                              | 782.3 ± 195.5                                     | 3929.0 ± 80.6                                      | 8.8 ± 4.5                             |
| 1000                             | 1461.5 ± 99.1                                     | 3537.6 ± 96.9                                      | 24.4 ± 7.4                            |
| Concentration ligand (μM)<br>ATP | On rate (s <sup>-1</sup> )<br>R156A               | Off rate (s <sup>-1</sup> )<br>R156A               | Lid closed (%)<br>R156A               |
| 10                               | 20.3 ± 4.4                                        | 874.9 ± 74.9                                       | 1.2 ± 0.5                             |
| 50                               | -                                                 | -                                                  | -                                     |
| 100                              | 158.8 ± 32.0                                      | 764.6 ± 36.5                                       | 14.4 ± 3.0                            |
| 200                              | -                                                 | -                                                  | -                                     |
| 500                              | -                                                 | -                                                  | -                                     |
| 1000                             | 1290.7 ± 203.8                                    | 800.1 ± 27.4                                       | 62.3 ± 3.2                            |

**Supplementary Table 4.** AK<sub>2</sub><sup>+</sup> binding behavior in the ClyA-AS nanopore with ATP with their individual values obtained in this study. Errors are given as standard deviation of the mean between independent pores ( $N \geq 3$ ). All current levels were collected in 250 mM KCl, 15 mM Tris, 2 mM MgCl<sub>2</sub>, pH 7.5 at room temperature (22°C) applying -90 mV (*trans*).

| Concentration ligand (μM)<br>ATP | On rate (s <sup>-1</sup> ) | Off rate (s <sup>-1</sup> ) | Lid closed (%) |
|----------------------------------|----------------------------|-----------------------------|----------------|
| 10                               | 53.8 ± 11.9                | 592.2 ± 26.6                | 9.3 ± 1.5      |
| 50                               | 237.7 ± 17.5               | 569.9 ± 17.5                | 32.7 ± 1.7     |
| 100                              | 426.3 ± 76.8               | 573.1 ± 48.0                | 48.5 ± 5.5     |
| 200                              | 734.8 ± 17.8               | 554.6 ± 16.3                | 62.6 ± 0.5     |
| 500                              | 1658.6 ± 105.4             | 448.1 ± 21.3                | 83.1 ± 0.4     |

|      |                |             |            |
|------|----------------|-------------|------------|
| 1000 | 3054.1 ± 110.3 | 393.1 ± 5.3 | 91.5 ± 0.6 |
|------|----------------|-------------|------------|

**Supplementary Table 5.** AK<sub>2</sub><sup>+</sup> binding behavior in the ClyA-AS nanopore with 1 mM ATP and AMP with their individual values obtained in this study. Errors are given as standard deviation of the mean between independent pores ( $N \geq 3$ ). All current levels were collected in 400 mM KCl, 15 mM Tris, 2 mM MgCl<sub>2</sub> (unless omitted), pH 7.5 at room temperature (22°C) applying -90 mV (*trans*).

| Concentration ligand (μM)<br>1 mM ATP + [AMP] | On rate LID (s <sup>-1</sup> )                    | Off rate LID (s <sup>-1</sup> )                    | Off rate NMP domain (s <sup>-1</sup> )                           | Lid closed (%)                        |
|-----------------------------------------------|---------------------------------------------------|----------------------------------------------------|------------------------------------------------------------------|---------------------------------------|
| 0                                             | 1380.7 ± 569.2                                    | 825.2 ± 146.9                                      | -                                                                | 75.4 ± 7.6                            |
| 10                                            | 1816.8 ± 227.0                                    | 695.8 ± 151.5                                      | -                                                                | 78.0 ± 5.6                            |
| 20                                            | -                                                 | -                                                  | -                                                                | -                                     |
| 50                                            | 2066.0 ± 310.12                                   | 245.7 ± 20.6                                       | 4436.9 ± 5634                                                    | 92.9 ± 2.3                            |
| 100                                           | 2082.2 ± 204.1                                    | 177.9 ± 45.1                                       | 4123.3 ± 625.9                                                   | 96.7 ± 1.0                            |
| 200                                           | 2196.7 ± 131.8                                    | 118.9 ± 36.3                                       | 3265.4 ± 723.8                                                   | 98.6 ± 0.7                            |
| 500                                           | 2523.8 ± 241.9                                    | 109.0 ± 1.8                                        | 3661.1 ± 220.7                                                   | 99.4 ± 0.1                            |
| 1000                                          | 2423.3 ± 649.9                                    | 119.6 ± 13.0                                       | 3172.0 ± 257.7                                                   | 99.5 ± 0.1                            |
| Concentration ligand (μM)<br>1 mM ATP + [AMP] | On rate (s <sup>-1</sup> )<br>No Mg <sup>2+</sup> | Off rate (s <sup>-1</sup> )<br>No Mg <sup>2+</sup> | Off rate (s <sup>-1</sup> )<br>NMP domain<br>No Mg <sup>2+</sup> | Lid closed (%)<br>No Mg <sup>2+</sup> |
| 0                                             | 1461.5 ± 99.1                                     | 3537.6 ± 96.9                                      | -                                                                | 24.2 ± 7.4                            |
| 10                                            | -                                                 | -                                                  | -                                                                | -                                     |
| 20                                            | 1714.3 ± 100.7                                    | 418.8 ± 244.6<br>2957.7 ± 656.4                    | -                                                                | 36.7 ± 10.9                           |
| 50                                            | 1819.1 ± 146.9                                    | 287.0 ± 52.6<br>2918.2 ± 415.4                     | -                                                                | 45.6 ± 6.1                            |
| 100                                           | 1784.2 ± 100.2                                    | 131.6 ± 46.2<br>2854.6 ± 422.7                     | -                                                                | 52.5 ± 10.3                           |
| 200                                           | 1817.1 ± 25.2                                     | 107.2 ± 15.5<br>2785.9 ± 231.1                     | -                                                                | 52.0 ± 3.6                            |
| 500                                           | 1696.9 ± 47.4                                     | 61.5 ± 16.4<br>2558.9 ± 717.9                      | -                                                                | 66.9 ± 13.7                           |
| 1000                                          | 1768.3 ± 185.4                                    | 40.3 ± 18.0<br>2000.6 ± 546.8                      | -                                                                | 79.5 ± 10.0                           |
| Concentration ligand (μM)<br>1 mM ATP + [AMP] | On rate (s <sup>-1</sup> )<br>R156A               | Off rate (s <sup>-1</sup> )<br>R156A               | Off rate (s <sup>-1</sup> )<br>NMP domain<br>R156A               | Lid closed (%)<br>R156A               |
| 0                                             | 1290.7 ± 203.8                                    | 800.1 ± 27.4                                       | -                                                                | 62.3 ± 3.2                            |
| 10                                            | 1276.0 ± 141.6                                    | 681.0 ± 37.6                                       | -                                                                | 66.7 ± 1.3                            |
| 20                                            | -                                                 | -                                                  | -                                                                | -                                     |
| 50                                            | -                                                 | -                                                  | -                                                                | -                                     |
| 100                                           | 1452.6 ± 95.6                                     | 626.8 ± 95.4                                       | -                                                                | 70.9 ± 2.5                            |
| 200                                           | -                                                 | -                                                  | -                                                                | -                                     |
| 500                                           | -                                                 | -                                                  | -                                                                | -                                     |

|      |                |              |   |            |
|------|----------------|--------------|---|------------|
| 1000 | 1513.4 ± 178.1 | 418.1 ± 11.2 | - | 80.4 ± 1.4 |
|------|----------------|--------------|---|------------|

**Supplementary Table 6.** AK<sub>2</sub><sup>+</sup> binding behavior in the ClyA-AS nanopore with ADP with their individual values obtained in this study. Errors are given as standard deviation of the mean between independent pores ( $N \geq 3$ ). All current levels were collected in 400 mM KCl, 15 mM Tris, 2 mM MgCl<sub>2</sub> (unless omitted), pH 7.5 at room temperature (22°C) applying -90 mV (*trans*).

| Concentration ligand (μM)<br>ADP | On rate Type I (s <sup>-1</sup> )                        | Off rate Type I (s <sup>-1</sup> )                        | Lid closed Type I (%)                        |
|----------------------------------|----------------------------------------------------------|-----------------------------------------------------------|----------------------------------------------|
| 10                               | 32.6 ± 13.3                                              | 805.8 ± 136.3                                             | 2.1 ± 1.3                                    |
| 20                               | 121.2 ± 18.4                                             | 420.5 ± 52.5                                              | 15.9 ± 5.7                                   |
| 50                               | 272.2 ± 30.1                                             | 214.8 ± 27.6                                              | 52.0 ± 4.7                                   |
| 100                              | 762.2 ± 219.2                                            | 167.5 ± 49.4                                              | 82.9 ± 1.3                                   |
| 200                              | 1272.0 ± 385.7                                           | 101.9 ± 36.5                                              | 93.9 ± 3.4                                   |
| 500                              | 2706.7 ± 223.4                                           | 64.3 ± 9.2                                                | 98.5 ± 0.7                                   |
| 1000                             | 3456.9 ± 650.1                                           | 65.9 ± 22.0                                               | 98.8 ± 1.6                                   |
| Concentration ligand (μM)<br>ADP | On rate Type I (s <sup>-1</sup> )<br>No Mg <sup>2+</sup> | Off rate Type I (s <sup>-1</sup> )<br>No Mg <sup>2+</sup> | Lid closed Type I (%)<br>No Mg <sup>2+</sup> |
| 10                               | 78.7 ± 38.0                                              | 713.6 ± 96.7                                              | 7.0 ± 0.5                                    |
| 20                               | 162.2 ± 36.8                                             | 690.6 ± 43.8                                              | 18.0 ± 4.1                                   |
| 50                               | 385.6 ± 194.0                                            | 526.6 ± 123.8                                             | 40.8 ± 18.6                                  |
| 100                              | 648.6 ± 313.3                                            | 427.5 ± 84.0                                              | 54.6 ± 21.6                                  |
| 200                              | 1125.0 ± 347.2                                           | 315.8 ± 78.3                                              | 79.3 ± 9.6                                   |
| 500                              | -                                                        | -                                                         | -                                            |
| 1000                             | 3791.5 ± 624.3                                           | 73.0 ± 1.5                                                | 99.3 ± 0.2                                   |
| Concentration ligand (μM)<br>ADP | On rate Type II (s <sup>-1</sup> )                       | Off rate Type II (s <sup>-1</sup> )                       | Lid closed Type II (%)                       |
| 10                               | -                                                        | -                                                         | -                                            |
| 20                               | -                                                        | -                                                         | -                                            |
| 50                               | 246.8 ± 35.4                                             | 757.8 ± 139.5                                             | 23.0 ± 6.7                                   |
| 100                              | 693.9 ± 198.4                                            | 706.7 ± 174.1                                             | 45.5 ± 5.0                                   |
| 200                              | 868.7 ± 334.9                                            | 604.2 ± 82.5                                              | 71.4 ± 8.8                                   |
| 500                              | 2697.1 ± 450.4                                           | 471.9 ± 109.6                                             | 93.5 ± 5.6                                   |
| 1000                             | 4434.7 ± 1372.5                                          | 466.9 ± 177.6                                             | 92.1 ± 8.0                                   |



**Supplementary Table 7.** Comparison of dissociation constants, and the opening and closing rates for AK from other studies.

| Ligand                                | $K_m$<br>( $\mu M$ )                                                      | $V_{max}$<br>(units/mg)               | $k_{cat}$<br>( $s^{-1}$ )             | $k_{cat} / K_m$<br>( $s^{-1} \mu M^{-1}$ ) | $K_D$<br>( $\mu M$ )                                   | $k_{opening}$<br>(LID)<br>( $s^{-1}$ ) | $k_{closing}$<br>(LID)<br>( $s^{-1}$ )  |
|---------------------------------------|---------------------------------------------------------------------------|---------------------------------------|---------------------------------------|--------------------------------------------|--------------------------------------------------------|----------------------------------------|-----------------------------------------|
| ATP<br>(+mg <sup>2+</sup> )           | 71 <sup>7</sup><br>42 <sup>8</sup><br>144 <sup>9</sup><br>60 <sup>3</sup> | 780 <sup>7</sup><br>1050 <sup>9</sup> | 305 <sup>7</sup>                      | 4.3 <sup>7</sup><br>0.16 <sup>8</sup>      | 85 <sup>7</sup><br>170 <sup>8</sup>                    |                                        |                                         |
| ATP                                   |                                                                           |                                       |                                       |                                            | 35 <sup>7</sup><br>44 <sup>8</sup><br>50 <sup>10</sup> |                                        |                                         |
| AMP<br>(+mg <sup>2+</sup> )           | 33 <sup>9</sup>                                                           | 1038 <sup>9</sup>                     |                                       |                                            |                                                        |                                        |                                         |
| AMP                                   | 26 <sup>7</sup><br>98 <sup>8</sup><br>120 <sup>3</sup>                    | 770 <sup>7</sup>                      | 300 <sup>7</sup>                      | 11.6 <sup>7</sup><br>0.066 <sup>8</sup>    | 520 <sup>7</sup><br>500 <sup>8</sup>                   |                                        |                                         |
| ADP<br>(+mg <sup>2+</sup> )           | 75 <sup>7</sup><br>33 <sup>3</sup>                                        | 330 <sup>7</sup>                      | 130 <sup>7</sup>                      | 1.7 <sup>7</sup>                           |                                                        |                                        |                                         |
| ADP                                   | 4 <sup>7</sup><br>28 <sup>3</sup>                                         | 257 <sup>7</sup>                      | 100 <sup>7</sup>                      | 25 <sup>7</sup>                            | 4 <sup>7</sup>                                         |                                        |                                         |
| Ap5A (+mg <sup>2+</sup> )             |                                                                           |                                       |                                       |                                            | 0.015 <sup>7</sup>                                     | 1 <sup>11</sup>                        |                                         |
| Ap5A                                  |                                                                           |                                       |                                       |                                            | 0.1 <sup>7</sup>                                       | 390 <sup>12</sup>                      | 390 <sup>12</sup>                       |
| Steady-state<br>(+mg <sup>2+</sup> )  |                                                                           |                                       | 650 <sup>8</sup><br>263 <sup>13</sup> |                                            |                                                        |                                        |                                         |
| AMP-PNP + AMP<br>(+mg <sup>2+</sup> ) |                                                                           |                                       |                                       |                                            |                                                        | 286 <sup>13</sup><br>160 <sup>14</sup> | 1374 <sup>13</sup><br>440 <sup>14</sup> |
| ADP + ADP<br>(+mg <sup>2+</sup> )     |                                                                           |                                       |                                       |                                            |                                                        | 190 <sup>15</sup>                      |                                         |
| ADP + ADP                             |                                                                           |                                       |                                       |                                            |                                                        | 0.05 <sup>15</sup>                     |                                         |
| ADP + AMP<br>(+mg <sup>2+</sup> )     |                                                                           |                                       |                                       |                                            |                                                        | 2800 <sup>15</sup>                     |                                         |
| ADP + AMP                             |                                                                           |                                       |                                       |                                            |                                                        | 0.09 <sup>15</sup>                     |                                         |

**Supplementary Table 8.** Estimated rates and 95% confidence intervals (CIs) for the kinetic model for the ATP-induced endosteric closing of the LID and NMP domain presented in (Figure 3). The rates were retrieved by fitting the kinetic data to a Hidden Markov Model (HMM) based on the four observable states and using different ligand concentration. The confidence intervals are approximated using the asymptotic normality of the maximum likelihood estimator. The bounds were computed using the inverse hessian evaluated at the attained log optimum, and subsequently exponentiated to obtain an interval in linear scale.

| Corresponding reactions                                     | Estimate | 95% CI      |             |
|-------------------------------------------------------------|----------|-------------|-------------|
|                                                             |          | Lower bound | Upper bound |
| $M \rightarrow M^*; M1 \rightarrow M1^* (\cdot  ATP ^{-1})$ | 2.2E+04  | 1.4E+04     | 3.5E+04     |
| $M \leftarrow M^*; M1 \leftarrow M1^*$                      | 2.5E+04  | 1.6E+04     | 4.0E+04     |
| $M \rightarrow M1; M^* \rightarrow M1^*$                    | 5.0E-01  | 4.8E-02     | 5.1E+00     |
| $M \leftarrow M1; M^* \leftarrow M1^*$                      | 2.0E+01  | 1.6E+00     | 2.4E+02     |
| $M^* \rightarrow M2^*$                                      | 4.2E+03  | 3.7E+03     | 4.8E+03     |
| $M^* \leftarrow M2^*$                                       | 7.9E+02  | 7.3E+02     | 8.6E+02     |
| $M2^* \rightarrow M2^{**} (\cdot  AMP ^{-1})$               | 1.0E+04  | 6.0E+03     | 1.7E+04     |
| $M2^* \leftarrow M2^{**}$                                   | 4.7E+02  | 4.0E+02     | 5.5E+02     |
| $M2^{**} \rightarrow M^{**}$                                | 3.2E+01  | 1.6E+01     | 6.3E+01     |
| $M2^{**} \leftarrow M^{**}$                                 | 2.3E+03  | 1.7E+03     | 3.0E+03     |
| $M2^{**} \rightarrow M1^{**}$                               | 3.2E+01  | 2.2E+01     | 4.5E+01     |
| $M2^{**} \leftarrow M1^{**}$                                | 1.7E+03  | 1.5E+03     | 2.0E+03     |
| $M2^{**} \rightarrow M3^{**}$                               | 5.3E+02  | 4.7E+02     | 5.9E+02     |
| $M2^{**} \leftarrow M3^{**}$                                | 1.2E+03  | 1.1E+03     | 1.2E+03     |

**Supplementary Table 9.** Attained log likelihoods for specifications V1, V2, and V3 for models of both ATP+AMP and ADP binding. The magnitudes of differences are attributable to the large size of the experimental datasets. Predictions made by the different models are provided in Supplementary Table 10 and 12, as well as in Supplementary Figures 18 and 22.

| Ligand  | Log Likelihood |          |          |
|---------|----------------|----------|----------|
|         | Model V1       | Model V2 | Model V3 |
| ATP+AMP | -1064262       | -1055567 | -1052792 |
| ADP     | -1004224       | -1003806 | -1003676 |

**Supplementary Table 10:** AK<sub>2</sub><sup>+</sup> binding behavior in the ClyA-AS nanopore with ATP and ATP + AMP with their individual values obtained in this study compared to the rates obtained from the different models. Errors are given as standard deviation of the mean between independent pores ( $N \geq 3$ ). All current levels were collected in 400 mM KCl, 15 mM Tris, 2 mM MgCl<sub>2</sub>, pH 7.5 at room temperature (22°C) applying -90 mV (*trans*).

| Concentration ligand (μM)<br>ATP | On rate (s <sup>-1</sup> )<br>Experimental | On rate (s <sup>-1</sup> )<br>Model V1 | On rate (s <sup>-1</sup> )<br>Model V2 | On rate (s <sup>-1</sup> )<br>Model V3 |
|----------------------------------|--------------------------------------------|----------------------------------------|----------------------------------------|----------------------------------------|
| 10                               | 25.6 ± 7.2                                 | 31.96436                               | 42.21194                               | 31.26268                               |
| 20                               |                                            | 62.02038                               | 82.04444                               | 61.14218                               |
| 50                               | 90.8 ± 38.9                                | 152.57324                              | 193.85023                              | 151.14327                              |
| 100                              | 218.0 ± 7.9                                | 293.56915                              | 369.29412                              | 292.55801                              |
| 200                              | 356.2 ± 54.8                               | 539.44902                              | 644.92219                              | 547.44169                              |
| 500                              | 1031.0 ± 257.0                             | 1120.89039                             | 1203.5084                              | 1182.65102                             |
| 1000                             | 1883.9 ± 315.2                             | 1706.77827                             | 1737.70511                             | 1908.27891                             |

| Concentration ligand (μM)<br>ATP | Off rate (s <sup>-1</sup> )<br>Experimental | Off rate (s <sup>-1</sup> )<br>Model V1 | Off rate (s <sup>-1</sup> )<br>Model V2 | Off rate (s <sup>-1</sup> )<br>Model V3 |
|----------------------------------|---------------------------------------------|-----------------------------------------|-----------------------------------------|-----------------------------------------|
| 10                               | 854.3 ± 256.5                               | 555.76538                               | 786.12025                               | 764.81086                               |
| 20                               |                                             | 545.88761                               | 754.82367                               | 760.07013                               |
| 50                               | 852.5 ± 59.1                                | 552.89306                               | 762.80077                               | 766.02413                               |
| 100                              | 799.8 ± 57.0                                | 550.89293                               | 760.06285                               | 761.55648                               |
| 200                              | 721.4 ± 94.9                                | 551.60849                               | 766.06194                               | 763.55952                               |
| 500                              | 744.5 ± 25.8                                | 552.86595                               | 768.70577                               | 763.72974                               |
| 1000                             | 693.4 ± 29.6                                | 551.70176                               | 770.13131                               | 760.39578                               |

| Concentration ligand (μM)<br>1 mM ATP + AMP | Off rate (s <sup>-1</sup> )<br>Experimental | Off rate (s <sup>-1</sup> )<br>Model V1 | Off rate (s <sup>-1</sup> )<br>Model V2 | Off rate (s <sup>-1</sup> )<br>Model V3 |
|---------------------------------------------|---------------------------------------------|-----------------------------------------|-----------------------------------------|-----------------------------------------|
| 0                                           | 825.2 ± 146.9                               | 551.70176                               | 770.13131                               | 760.39578                               |
| 10                                          | 695.8 ± 151.5                               | 528.06677                               | 570.59809                               | 586.19456                               |
| 50                                          | 245.7 ± 20.6                                | 474.58284                               | 280.01847                               | 319.89386                               |
| 100                                         | 177.9 ± 45.1                                | 444.97613                               | 183.41001                               | 220.03107                               |
| 200                                         | 118.9 ± 36.3                                | 421.65804                               | 110.89857                               | 150.39347                               |
| 500                                         | 109.0 ± 1.8                                 | 399.48578                               | 61.61589                                | 98.86489                                |
| 1000                                        | 119.6 ± 13.0                                | 391.9359                                | 43.60949                                | 80.11941                                |

**Supplementary Table 11.** Estimated rates and 95% confidence intervals (CIs) for the kinetic model for the ADP-induced endosteric closing of the LID and NMP domain presented in (Supplementary Figure 21). The rates were retrieved by fitting the kinetic data to a Hidden Markov Model (HMM) based on the four observable states and using different ligand concentration. The confidence intervals are approximated using the asymptotic normality of the maximum likelihood estimator. The bounds were computed using the inverse hessian evaluated at the attained log optimum, and subsequently exponentiated to obtain an interval in linear scale.

| Corresponding reactions                                     | Estimate | 95% CI      |             |
|-------------------------------------------------------------|----------|-------------|-------------|
|                                                             |          | Lower bound | Upper bound |
| $M \rightarrow M^*; M1 \rightarrow M1^* (\cdot  ADP ^{-1})$ | 5.6E+04  | 1.8E+04     | 1.7E+05     |
| $M \leftarrow M^*; M1 \leftarrow M1^*$                      | 4.2E+03  | 1.9E+03     | 9.4E+03     |
| $M \rightarrow M1; M^* \rightarrow M1^*$                    | 5.0E-01  | 2.9E-01     | 8.7E-01     |
| $M \leftarrow M1; M^* \leftarrow M1^*$                      | 2.0E+01  | 3.0E+00     | 1.3E+02     |
| $M^* \rightarrow M2^*$                                      | 1.0E+03  | 7.3E+02     | 1.4E+03     |
| $M^* \leftarrow M2^*$                                       | 1.0E+03  | 7.8E+02     | 1.3E+03     |
| $M2^* \rightarrow M2^{**} (\cdot  ADP ^{-1})$               | 3.1E+04  | 2.0E+04     | 4.9E+04     |
| $M2^* \leftarrow M2^{**}$                                   | 5.0E+02  | 3.3E+02     | 7.5E+02     |
| $M2^{**} \rightarrow M^{**}$                                | 5.0E+01  | 3.7E+01     | 6.8E+01     |
| $M2^{**} \leftarrow M^{**}$                                 | 1.2E+04  | 8.3E+03     | 1.9E+04     |
| $M2^{**} \rightarrow M1^{**}$                               | 5.0E+01  | 3.5E+01     | 7.2E+01     |
| $M2^{**} \leftarrow M1^{**}$                                | 1.0E+04  | 7.0E+03     | 1.4E+04     |
| $M2^{**} \rightarrow M3^{**}$                               | 1.8E+02  | 1.4E+02     | 2.3E+02     |
| $M2^{**} \leftarrow M3^{**}$                                | 3.2E+03  | 2.0E+03     | 4.9E+03     |

**Supplementary Table 12.** AK<sub>2+</sub> binding behavior in the ClyA-AS nanopore with ADP with their individual values obtained in this study compared to the rates obtained from the different models. Errors are given as standard deviation of the mean between independent pores ( $N \geq 3$ ). All current levels were collected in 400 mM KCl, 15 mM Tris, 2 mM MgCl<sub>2</sub>, pH 7.5 at room temperature (22°C) applying -90 mV (*trans*).

| Concentration ligand ( $\mu$ M)<br>ADP | On rate ( $s^{-1}$ )<br>Experimental | On rate ( $s^{-1}$ )<br>Model V1 | On rate ( $s^{-1}$ )<br>Model V2 | On rate ( $s^{-1}$ )<br>Model V3 |
|----------------------------------------|--------------------------------------|----------------------------------|----------------------------------|----------------------------------|
| 10                                     | 32.6 $\pm$ 13.3                      | 89.52363                         | 161.81494                        | 118.13011                        |
| 20                                     | 121.2 $\pm$ 18.4                     | 186.25179                        | 316.23401                        | 220.79752                        |
| 50                                     | 272.2 $\pm$ 30.1                     | 470.90594                        | 699.30327                        | 485.07022                        |
| 100                                    | 762.2 $\pm$ 219.2                    | 789.18324                        | 1139.99299                       | 823.65124                        |
| 200                                    | 1272.0 $\pm$ 385.7                   | 1035.21256                       | 1791.30071                       | 1367.44035                       |
| 500                                    | 2706.7 $\pm$ 223.4                   | 1180.32201                       | 2807.55487                       | 2568.10831                       |
| 1000                                   | 3456.9 $\pm$ 650.1                   | 1221.05205                       | 3773.14088                       | 3905.85001                       |

| Concentration<br>ligand ( $\mu\text{M}$ )<br>ADP | Off rate<br>( $\text{s}^{-1}$ )<br>Experimental | Off rate<br>( $\text{s}^{-1}$ )<br>Model V1 | Off rate<br>( $\text{s}^{-1}$ )<br>Model V2 | Off rate<br>( $\text{s}^{-1}$ )<br>Model V3 |
|--------------------------------------------------|-------------------------------------------------|---------------------------------------------|---------------------------------------------|---------------------------------------------|
| 10                                               | $805.8 \pm 136.3$                               | 156.53069                                   | 332.39745                                   | 625.00134                                   |
| 20                                               | $420.5 \pm 52.5$                                | 158.96316                                   | 315.7657                                    | 470.98335                                   |
| 50                                               | $214.8 \pm 27.6$                                | 166.48589                                   | 260.81214                                   | 293.52471                                   |
| 100                                              | $167.5 \pm 49.4$                                | 172.46858                                   | 203.11697                                   | 202.1295                                    |
| 200                                              | $101.9 \pm 36.5$                                | 177.51918                                   | 148.16956                                   | 148.71376                                   |
| 500                                              | $64.3 \pm 9.2$                                  | 180.30542                                   | 96.721                                      | 110.88129                                   |
| 1000                                             | $65.9 \pm 22.0$                                 | 182.39427                                   | 73.55647                                    | 98.22771                                    |

**Supplementary Table 13.** Approximate mean emissions per group of states with identical LID/NMP arrangements.

| States        | Approximate mean emission |
|---------------|---------------------------|
| M0            | -180 pA                   |
| M1, M1*, M1** | -210 pA                   |
| M, M*, M**    | -200 pA                   |
| M2*, M2**     | -225 pA                   |
| M3**          | -240 pA                   |

## Supplementary References

1. Borglund, E., Brolin, S. E. & Ågren, A. Fluorometric Microassays of Adenylate Kinase, an Enzyme Important in Energy Metabolism. *Ups. J. Med. Sci.* **83**, 81–84 (1978).
2. Vaca, G., Sanchez-Corona, J., Olivares, N., Medina, C. & Cantu, J. M. A simple screening procedure for adenylate kinase, hexokinase and glucose-6-phosphate dehydrogenase deficiencies. *Ann. Genet.* **23**, 190–2 (1980).
3. Sheng, X. R., Li, X. & Pan, X. M. An Iso-random Bi Bi Mechanism for Adenylate Kinase. *J. Biol. Chem.* **274**, 22238–22242 (1999).
4. Van Meervelt, V., Soskine, M. & Maglia, G. Detection of two isomeric binding configurations in a protein-aptamer complex with a biological nanopore. *ACS Nano* **8**, 12826–35 (2014).
5. Huang, G. *et al.* PlyAB Nanopores Detect Single Amino Acid Differences in Folded Haemoglobin from Blood\*\*. *Angew. Chemie Int. Ed.* **61**, (2022).
6. Van Meervelt, V. *et al.* Real-Time Conformational Changes and Controlled Orientation of Native Proteins Inside a Protein Nanoreactor. *J. Am. Chem. Soc.* **139**, 18640–18646 (2017).
7. Reinstein, J. *et al.* Fluorescence and NMR investigations on the ligand binding properties of adenylate kinases. *Biochemistry* **29**, 7440–7450 (1990).
8. Yan, H. & Tsai, M. D. Mechanism of adenylate kinase. Demonstration of a functional relationship between aspartate 93 and magnesium by site-directed mutagenesis and proton, phosphorus-31, and magnesium-25 NMR. *Biochemistry* **30**, 5539–5546 (1991).
9. Sinev, M. A., Sineva, E. V., Ittah, V. & Haas, E. Domain Closure in Adenylate Kinase. *Biochemistry* **35**, 6425–6437 (1996).
10. Ådén, J., Weise, C. F., Brännström, K., Olofsson, A. & Wolf-Watz, M. Structural Topology and Activation of an Initial Adenylate Kinase–Substrate Complex. *Biochemistry* **52**, 1055–1061 (2013).
11. Pelz, B., Žoldák, G., Zeller, F., Zacharias, M. & Rief, M. Subnanometre enzyme mechanics probed by single-molecule force spectroscopy. *Nat. Commun.* **7**, 10848 (2016).
12. Henzler-Wildman, K. A. *et al.* Intrinsic motions along an enzymatic reaction trajectory. *Nature* **450**, 838–844 (2007).
13. Wolf-Watz, M. *et al.* Linkage between dynamics and catalysis in a thermophilic-mesophilic enzyme pair. *Nat. Struct. Mol. Biol.* **11**, 945–949 (2004).
14. Hanson, J. A. *et al.* Illuminating the mechanistic roles of enzyme conformational dynamics. *Proc. Natl. Acad. Sci.* **104**, 18055–18060 (2007).
15. Kerns, S. J. *et al.* The energy landscape of adenylate kinase during catalysis. *Nat. Struct. Mol. Biol.* **22**, 124–131 (2015).
